# Supplementary material for: BiU-Net: A Biologically Informed U-Net for Genotype Imputation
Source: Research Square preprint supplement (doi:10.21203/rs.3.rs-6797863/v1), 2025-08-26
Supplement: Supplementary file 1 [file b101da3e1d9386e1f91dc41f.docx]

**Supplementary materials for the paper:**

**BiU-Net: A Biologically Informed U-Net for Genotype Imputation**

Table of Contents

[S1. Overview 1](#_Toc199612519)

[S2. Imputation performance comparison across datasets 1](#_Toc199612520)

[**S2.1 1KGP Results** 1](#_Toc199612521)

[**S2.2 LOS Results** 2](#_Toc199612522)

[**S2.3 SGDP Results** 3](#_Toc199612523)

[S3. Cohort-Specific Performance on the LOS dataset 4](#_Toc199612524)

[S4. Imputation performance on rare variants 6](#_Toc199612525)

[S5. Conclusion 7](#_Toc199612526)

[S6. Appendix. Tables & Figures 7](#_Toc199612527)

# **S1. Overview**

This supplement provides extended experimental results, detailed performance comparisons, and cohort-specific evaluations supporting the findings presented in the main manuscript. Performance metrics include Accuracy, R², Precision, Recall, and F1-score, evaluated across varying missingness levels, allele frequency bins, and population cohorts.

The analyses are based on three datasets:

- **1000 Genomes Project (1KGP)** – chromosome 22
- **Louisiana Osteoporosis Study (LOS)** – chromosome 22
- **Simons Genome Diversity Project (SGDP)** – chromosome 22 and the HLA region of chromosome 6

Models were evaluated under simulated genotype missingness levels of 5%, 15%, and 25%, with results stratified by minor allele frequency (MAF) bins (e.g., MAF ≤ 0.5%, 0.5–1%, 1–5%, etc.).

# **S2. Imputation performance comparison across datasets**

This experiment evaluates the imputation performance of the proposed BiU-Net model in comparison to Beagle and the SCDA model across multiple datasets. Comparisons are conducted on chromosome 22 of the 1KGP, LOS, and SGDP datasets under varying levels of missing ratio, as well as on the HLA region of chromosome 6 in the SGDP dataset. Performance metrics are reported across MAF bins and overall, as detailed in tables S1–S20.

## **S2.1 1KGP Results**

*(Appendix Table S1–S3: Chromosome 22, all populations: South Asian, East Asian, African, Admixed American, and European, totally 241113 SNPs, 263 test samples; Figure S4: visualization for the model performance on this dataset)*

The first three Tables S1–S3 summarize the imputation performance of each method under increasing levels of missingness (5%, 15%, and 25%) on the 1KGP dataset. Table S1 demonstrates that the BiU-Net model achieves the highest performance across all metrics at the 5% missing level. BiU-Net consistently outperforms other methods across all MAF ranges, particularly for rare variants with MAF <1%, where it achieves significantly higher R2 and precision. Specifically, for rare variants with MAF between 0.5% and 1%, BiU-Net achieves an R2 of 0.9965, compared to Beagle’s 0.8981 and SCDA’s 0.6813. For variants with MAF <0.5% at the 15% missing level (Table S2), BiU-Net attains an R2 of 0.9655, outperforming Beagle (0.8925) and SCDA (0.6246). In more extreme cases, such as variants with MAF <0.5% at a 25% missing level (Table S3), Beagle achieves the highest R2 (0.8698) among all three methods, followed by BiU-Net (0.8495) and SCDA (0.5542). Across all evaluated levels of missingness, BiU-Net consistently achieved the highest imputation precision, recall, and F1 scores, maintaining a substantial margin over alternative methods.

We also observe that precision remains with similar trends across different MAF bins at the same missing level for each method, respectively. However, while BiU-Net and SCDA consistently outperform Beagle in precision, SCDA’s precision drops abruptly for SNPs with MAF <10%.

These observations suggest that while deep learning-based models generally outperform traditional reference-based methods, their effectiveness is influenced by variant frequency and missingness severity. Although SCDA outperforms Beagle in overall metrics for common variants, it struggles with rare variants (MAF < 20%) in the 1KGP dataset. This limitation likely stems from the limited number of rare alleles available for learning in small-to-moderate-sized datasets. BiU-Net, however, consistently mitigates this weakness and demonstrates superior generalizability, especially for the rarest variants, which we attribute to its U-Net-inspired architecture and the use of genotype segmentation as an effective data augmentation strategy.

## **S2.2 LOS Results**

*(Appendix Table S4–S6: Chromosome 22, African American & Caucasian cohorts, totally 257352 SNPs, 754 test samples; Figure S3, S5: visualization for the model performance on this dataset)*

Tables S4 to S6 further support these findings by presenting results on the LOS dataset, which provides substantially more training data. In this setting, both SCDA and BiU-Net exhibit notable performance gains compared to their results on 1KGP, highlighting the importance of training sample size for reference-free models. BiU-Net achieves the highest overall R² at all missing levels—0.9932, 0.9787, and 0.9634 for 5%, 15%, and 25% missing, respectively—and consistently leads across the MAF spectrum. Notably, it ranks first in both the rarest (≤ 0.5%) and most common (40% ≤ MAF ≤ 50%) bins across all levels of missingness. SCDA also improves substantially in the LOS dataset, even surpassing Beagle by a large margin, underscoring that reference-free models benefit from larger training sets. Although BiU-Net occasionally ranked second within certain MAF bins, the performance differences were marginal, and BiU-Net maintained the leading overall R² across all missingness levels. Taken together, these results demonstrate BiU-Net’s robustness across datasets, variant frequencies, and degrees of data sparsity.

To better understand model differences in genotype classification behavior, we examined confusion matrices comparing BiU-Net and Beagle. In this comparison, both BiU-Net and Beagle were evaluated on the Caucasian cohort of chromosome 22 from the LOS dataset, using a segment length of 128 genotypes and an overlap of 16 genotypes, under a fixed missingness level and random seed. Supplementary Figure S3 presents a side-by-side comparison of the resulting confusion matrices, highlighting differences in the models' imputation behavior. While Beagle demonstrates competitive performance in genotype dosage prediction, it shows reduced phasing accuracy at heterozygous sites, where distinguishing between allele configurations (e.g., A|a vs. a|A) is biologically relevant. In contrast, BiU-Net produces substantially more accurate and confident predictions of phased genotypes. This capability makes BiU-Net especially advantageous for downstream analyses that rely on haplotype resolution, such as local ancestry inference and fine-mapping studies.

## **S2.3 SGDP Results**

*(Appendix Table S7–S9: Chromosome 22, all regions: African, Native American, Central Asian/Siberian, East Asian, Oceanian, South Asian, and West Eurasian, totally 117318 SNPs, 44 test samples; Table S10–S12: Chromosome 6 HLA region, African American cohort, totally 47740 SNPs, 44 test samples; Table S19–S20: Chromosome 22/ Chromosome 6 HLA region, SNPs excluded by Beagle during imputation; Figure S6: visualization for the model performance on this dataset)*

Tables S7 to S9 present the imputation performance of each model on chromosome 22 of the SGDP dataset, while Tables S10 to S12 report results for the HLA region of chromosome 6 in the same dataset. Notably, Beagle removes 6,468 SNPs (5.51% of the total 117,318 SNPs) from chromosome 22 and 6,444 SNPs (13.5% of the total 47,740 SNPs) from the HLA region after imputation. These excluded SNPs span all MAF ranges, with most being absent from the reference panel. As a result, Beagle's performance is evaluated only on the retained SNPs, whereas SCDA and BiU-Net are benchmarked on the full set of SNPs. Additionally, we assessed SCDA and BiU-Net on the subset of SNPs retained by Beagle and observed only marginal differences in performance, confirming that both models are well-trained and do not exhibit biases toward specific genomic sites. Given the small sample size of the SGDP dataset and the highly complex genetic structure of the HLA region, this represents the most challenging scenario in our study. We found that Beagle performs stably, demonstrating the advantage of reference-based methods, which leverage information from the reference panel. However, due to the previously discussed challenges of high-dimensionality and data scarcity, the SCDA model struggles to provide reliable imputation for variants with MAF ≤ 1% (Figures S6 and S7). In contrast, BiU-Net consistently achieves the highest performance across all settings in the HLA region for variants with MAF ≤ 0.5%, attributable to the augmentation of available training data through segmentation with increased overlap. Specifically, BiU-Net achieves R² values of 0.9790, 0.9868, and 0.9830 at 5%, 15%, and 25% missingness levels, respectively.

# **S3. Cohort-Specific Performance on the LOS dataset**

*(Table S13–S15: Chromosome 22, African American cohort, totally 307599 SNPs, 312 test samples; Table S16–S18: Chromosome 22, Caucasian cohort, totally 188399 SNPs, 442 test samples; Figure S10: visualization for the per-sample model performance comparison on this dataset)*

Due to cohort-specific quality control procedures, the retained SNP sets differed across cohorts. As a result, genotype sequences from different cohorts were not directly comparable, preventing parameter sharing or pretraining–finetuning strategies across cohorts. Therefore, BiU-Net and SCDA models were trained independently from scratch for each cohort. Within each cohort, models were trained and evaluated exclusively on samples from the same cohort to ensure consistency. All three methods, including Beagle, were benchmarked separately on their respective cohorts using various evaluation metrics. The results of this cohort-specific evaluation are presented in Tables S13–S18. These evaluations support four key observations:

1. **Beagle maintained stable performance** across single-cohort evaluations relative to the admixed population. For example, at 5% missingness, Beagle achieved an overall R² of 0.9138 on both the African American (AA) (Table S13) and Caucasian (CA) (Table S16) cohorts, closely matching its performance on the admixed LOS dataset (0.9191, Table S4). This stability persisted across increasing missingness levels: at 15% missingness, Beagle achieved R² values of 0.9107 (AA), 0.9118 (CA), and 0.9166 (admixed); at 25% missingness, 0.9069 (AA), 0.9091 (CA), and 0.9135 (admixed). The minimal variation across cohorts and missingness levels suggests that Beagle’s reference-based imputation is largely robust to differences in training population structure, relying primarily on the diversity and completeness of the reference panel rather than characteristics of the specific training cohort.
2. **SCDA exhibited substantial decreases in performance,** particularly in the African American cohort. Compared to its overall R2 of 0.9881 on the admixed cohort at 5% missingness (Table S4), SCDA dropped to 0.8730 in the AA cohort (Table S13), representing a relative decrease of ~11.65%. This decline was even more pronounced at higher missingness, with SCDA achieving only 0.6713 R2 at 25% missingness in AA (Table S15), compared to 0.9614 in the admixed case (Table S6). This sharp decline is likely due to SCDA’s reliance on full-length genotype inputs without segmentation, which limits its capacity to generalize in settings with limited training data. The absence of segmentation also prevents the model from effectively focusing on proximal genotype relationships within shorter genomic ranges—a structural inductive bias typically leveraged by CNNs for capturing local linkage patterns in ancestrally complex populations.
3. **BiU-Net improved in the Caucasian cohort** relative to the admixed cohort. At 5% missingness, its overall R2 increased from 0.9932 (Table S4) to 0.9962 in the CA-specific model (Table S16). This pattern held at 15% and 25% missingness as well, with R2 reaching 0.9876 and 0.9786, respectively—again outperforming its results on the full LOS dataset. The improvement may reflect the model's ability to leverage population homogeneity and longer LD blocks in the CA cohort.
4. **BiU-Net experienced a slight decline in the African American** cohort but maintained high overall performance. At 15% missingness, its overall R² decreased from 0.9787 in the admixed setting (Table S5) to 0.9632 in the AA cohort (Table S14), and at 25% missingness from 0.9634 (Table S6) to 0.9276 (Table S15). Although this represents a moderate decline, BiU-Net continued to outperform both Beagle and SCDA across all evaluation metrics in the AA cohort. Notably, it achieved high R² scores for rare variants (≤ 0.5% MAF), reaching 0.9976, 0.9587, and 0.9009 at 5%, 15%, and 25% missingness levels, respectively. These results demonstrate BiU-Net’s resilience in rare variant imputation, even within the genetically diverse and structurally complex African American population.

To further quantify differences in imputation performance, we conducted a per-sample R² comparison between BiU-Net models trained on cohort-specific versus admixed (ALL) populations, using only the overlapping SNPs and individuals shared across both training settings (Figure S10). This experimental design compares the performance of admixed-trained models on specific population groups. It helps assess whether training on admixed data benefits cohorts with complex genetic structures, compared to training on the target population alone. Specifically, the LOS dataset was stratified by population group—African American (AA), Caucasian (CA), and ALL (admixed)—and separate BiU-Net models were trained on each group's training partition. To evaluate performance, each test individual was imputed using both the cohort-specific and ALL-trained models, and R² scores were computed based on the intersecting set of SNPs for that individual. Per-sample R² scores were visualized using scatter plots, where the x-axis represents the performance of the admixed-trained model, and the y-axis represents that of the cohort-specific model. Interestingly, in the African American cohort, BiU-Net models trained on the admixed population consistently outperformed those trained specifically on African American samples, achieving average R² gains of 0.001, 0.007, and 0.022 at 5%, 15%, and 25% missingness levels, respectively, with no samples benefiting from cohort-specific training. In contrast, the model trained specifically on the Caucasian cohort outperformed the admixed-trained model when imputing Caucasian test samples, achieving better performance in 97–98% of cases, though the average R² improvements were minimal—+0.001 to +0.004. These findings indicate that BiU-Net demonstrates strong generalizability across diverse population groups. Notably, in genetically diverse cohorts such as the African American population, the model exhibits improved performance when trained on a broader spectrum of genetic variation. In contrast, for more genetically homogeneous cohorts such as the Caucasian group, cohort-specific training provides a slight performance advantage. These results suggest that admixed training is particularly beneficial for enhancing imputation accuracy in underrepresented or genetically complex populations.

# **S4. Imputation performance on rare variants**

The improvements of BiU-Net were especially notable for the rarest variants. For example, in the LOS CA cohort with 5% missing data, BiU-Net achieved R² = 0.9970 for SNPs with MAF ≤ 0.5%, whereas SCDA had an R² of 0.3219 (Table S16). In the AA cohort at the same missing data level, BiU-Net scored R² = 0.9976, whereas SCDA scored 0.5640 (Table S13). In the SGDP HLA region under 25% missingness, BiU-Net maintained R² = 0.9830, whereas SCDA decreased to 0.1792 (Table S12). These gains are attributed to BiU-Net’s segmentation strategy, U-Net-based architecture, positional encoding, and hybrid loss, all of which enhance rare variant sensitivity and generalizability.

# **S5. Conclusion**

Together, these findings demonstrate that BiU-Net delivers consistently strong imputation performance across cohorts with varying ancestry and missingness levels while remaining resilient to challenges like data sparsity and complex population structure. Compared to SCDA, which showed substantial performance degradation in the African American cohort, and Beagle, which remained stable but generally underperformed on rare variants, BiU-Net maintained high accuracy and outperformed both alternatives across most settings. Its architectural design—particularly the use of positional encoding and unified training on segmented data—enabled more effective rare variant recovery and broader generalization. Training on admixed populations further enhanced performance for underrepresented cohorts, supporting the strategy of incorporating genetic diversity to build more equitable and robust imputation models.

# **S6. Appendix. Tables & Figures**

**Table S1**. Model's imputation performances on chromosome 22 in the 1KGP (1000 Genomes Project) dataset under 5% missing ratio. The test set contains 263 samples from all populations, each with 241,113 SNPs. Bold fonts mark the highest values. "Acc" represents accuracy, "Prc" represents precision, "Rec" represents recall. Precision, recall, and F1 score are calculated as macro averages.

| **5% Missing** | | | | | | | | | |
| --- | --- | --- | --- | --- | --- | --- | --- | --- | --- |
| **#SNPs** | | **62625** | **41501** | **90533** | **17410** | **11479** | **9555** | **8010** | **241113** |
| **MAF** | | **<=0.5%** | **0.5%~1%** | **1%~10%** | **10%~20%** | **20%~30%** | **30%~40%** | **40%~50%** | **Overall** |
| **Acc** | **Beagle** | 0.9961 | 0.9927 | 0.9703 | 0.8831 | 0.8238 | 0.7859 | 0.7666 | 0.9535 |
| **SCDA** | 0.9945 | 0.9914 | 0.9839 | 0.9748 | 0.9710 | 0.9704 | 0.9691 | 0.9857 |
| **BiU-Net** | **1.0000** | **0.9999** | **0.9989** | **0.9977** | **0.9973** | **0.9974** | **0.9972** | **0.9991** |
| **R2** | **Beagle** | 0.8989 | 0.8981 | 0.9122 | 0.9095 | 0.8758 | 0.8506 | 0.8305 | 0.9212 |
| **SCDA** | 0.6350 | 0.6813 | 0.8691 | 0.9465 | 0.9428 | 0.9411 | 0.9352 | 0.9332 |
| **BiU-Net** | **0.9966** | **0.9965** | **0.9915** | **0.9952** | **0.9947** | **0.9948** | **0.9943** | **0.9957** |
| **Prc** | **Beagle** | 0.7477 | 0.7489 | 0.7499 | 0.7501 | 0.7484 | 0.7482 | 0.7484 | 0.7491 |
| **SCDA** | 0.8414 | 0.8868 | 0.9401 | 0.9591 | 0.9642 | 0.9681 | 0.9684 | 0.9567 |
| **BiU-Net** | **0.9984** | **0.9975** | **0.9964** | **0.9967** | **0.9969** | **0.9973** | **0.9972** | **0.9972** |
| **Rec** | **Beagle** | 0.7485 | 0.7494 | 0.7497 | 0.7500 | 0.7484 | 0.7482 | 0.7485 | 0.7491 |
| **SCDA** | 0.7521 | 0.7726 | 0.9045 | 0.9709 | 0.9736 | 0.9730 | 0.9702 | 0.9523 |
| **BiU-Net** | **0.9984** | **0.9989** | **0.9928** | **0.9965** | **0.9970** | **0.9973** | **0.9972** | **0.9964** |
| **F1** | **Beagle** | 0.7480 | 0.7491 | 0.7498 | 0.7500 | 0.7484 | 0.7482 | 0.7485 | 0.7491 |
| **SCDA** | 0.7891 | 0.8200 | 0.9217 | 0.9649 | 0.9687 | 0.9703 | 0.9690 | 0.9545 |
| **BiU-Net** | **0.9984** | **0.9982** | **0.9946** | **0.9966** | **0.9969** | **0.9973** | **0.9972** | **0.9968** |

**Table S2**. Model's imputation performances on chromosome 22 in the 1KGP (1000 Genomes Project) dataset under 15% missing ratio. The test set contains 263 samples from all populations, each with 241,113 SNPs. Bold fonts mark the highest values. "Acc" represents accuracy, "Prc" represents precision, "Rec" represents recall. Precision, recall, and F1 are calculated as macro averages.

| **15% Missing** | | | | | | | | | |
| --- | --- | --- | --- | --- | --- | --- | --- | --- | --- |
| **#SNPs** | | **62625** | **41501** | **90533** | **17410** | **11479** | **9555** | **8010** | **241113** |
| **MAF** | | **<=0.5%** | **0.5%~1%** | **1%~10%** | **10%~20%** | **20%~30%** | **30%~40%** | **40%~50%** | **Overall** |
| **Acc** | **Beagle** | 0.9960 | 0.9924 | 0.9699 | 0.8828 | 0.8244 | 0.7860 | 0.7671 | 0.9533 |
| **SCDA** | 0.9944 | 0.9907 | 0.9813 | 0.9692 | 0.9650 | 0.9644 | 0.9629 | 0.9834 |
| **BiU-Net** | **0.9995** | **0.9982** | **0.9961** | **0.9927** | **0.9915** | **0.9915** | **0.9912** | **0.9965** |
| **R2** | **Beagle** | 0.8925 | 0.8890 | 0.9085 | 0.9079 | 0.8746 | 0.8491 | 0.8292 | 0.9194 |
| **SCDA** | 0.6246 | 0.6525 | 0.8458 | 0.9322 | 0.9285 | 0.9270 | 0.9196 | 0.9207 |
| **BiU-Net** | **0.9655** | **0.9344** | **0.9698** | **0.9849** | **0.9836** | **0.9836** | **0.9821** | **0.9844** |
| **Prc** | **Beagle** | 0.7454 | 0.7444 | 0.7484 | 0.7500 | 0.7493 | 0.7483 | 0.7488 | 0.7490 |
| **SCDA** | 0.8287 | 0.8723 | 0.9368 | 0.9566 | 0.9603 | 0.9630 | 0.9623 | 0.9545 |
| **BiU-Net** | **0.9952** | **0.9917** | **0.9891** | **0.9899** | **0.9904** | **0.9912** | **0.9911** | **0.9911** |
| **Rec** | **Beagle** | 0.7457 | 0.7430 | 0.7474 | 0.7498 | 0.7495 | 0.7485 | 0.7491 | 0.7487 |
| **SCDA** | 0.7590 | 0.7557 | 0.8815 | 0.9568 | 0.9635 | 0.9654 | 0.9635 | 0.9388 |
| **BiU-Net** | **0.9703** | **0.9437** | **0.9730** | **0.9889** | **0.9904** | **0.9913** | **0.9912** | **0.9856** |
| **F1** | **Beagle** | 0.7455 | 0.7437 | 0.7479 | 0.7499 | 0.7494 | 0.7484 | 0.7489 | 0.7488 |
| **SCDA** | 0.7886 | 0.8034 | 0.9075 | 0.9567 | 0.9619 | 0.9641 | 0.9628 | 0.9465 |
| **BiU-Net** | **0.9824** | **0.9665** | **0.9810** | **0.9894** | **0.9904** | **0.9913** | **0.9911** | **0.9883** |

**Table S3.** Model's imputation performances on chromosome 22 in the 1KGP (1000 Genomes Project) dataset under 25% missing ratio. The test set contains 263 samples from all populations, each with 241,113 SNPs. Bold fonts mark the highest values. "Acc" represents accuracy, "Prc" represents precision, "Rec" represents recall. Precision, recall, and F1 are calculated as macro averages.

| **25% Missing** | | | | | | | | | |
| --- | --- | --- | --- | --- | --- | --- | --- | --- | --- |
| **#SNPs** | | **62625** | **41501** | **90533** | **17410** | **11479** | **9555** | **8010** | **241113** |
| **MAF** | | **<=0.5%** | **0.5%~1%** | **1%~10%** | **10%~20%** | **20%~30%** | **30%~40%** | **40%~50%** | **Overall** |
| **Acc** | **Beagle** | 0.9958 | 0.9922 | 0.9691 | 0.8815 | 0.8221 | 0.7849 | 0.7663 | 0.9527 |
| **SCDA** | 0.9934 | 0.9896 | 0.9773 | 0.9586 | 0.9529 | 0.9520 | 0.9499 | 0.9792 |
| **BiU-Net** | **0.9977** | **0.9962** | **0.9928** | **0.9866** | **0.9844** | **0.9844** | **0.9838** | **0.9932** |
| **R2** | **Beagle** | **0.8698** | **0.8778** | 0.9033 | 0.9052 | 0.8712 | 0.8463 | 0.8264 | 0.9163 |
| **SCDA** | 0.5542 | 0.6051 | 0.8097 | 0.9043 | 0.8990 | 0.8958 | 0.8856 | 0.8967 |
| **BiU-Net** | 0.8495 | 0.8619 | **0.9443** | **0.9720** | **0.9699** | **0.9697** | **0.9669** | **0.9694** |
| **Prc** | **Beagle** | 0.7411 | 0.7414 | 0.7447 | 0.7479 | 0.7462 | 0.7468 | 0.7476 | 0.7468 |
| **SCDA** | 0.7875 | 0.8470 | 0.9302 | 0.9511 | 0.9524 | 0.9529 | 0.9503 | 0.9499 |
| **BiU-Net** | **0.9903** | **0.9845** | **0.9809** | **0.9819** | **0.9826** | **0.9839** | **0.9837** | **0.9840** |
| **Rec** | **Beagle** | 0.7318 | 0.7367 | 0.7425 | 0.7474 | 0.7464 | 0.7473 | 0.7483 | 0.7458 |
| **SCDA** | 0.7119 | 0.7262 | 0.8479 | 0.9327 | 0.9449 | 0.9505 | 0.9497 | 0.9154 |
| **BiU-Net** | **0.8582** | **0.8778** | **0.9492** | **0.9792** | **0.9822** | **0.9841** | **0.9838** | **0.9706** |
| **F1** | **Beagle** | 0.7363 | 0.7390 | 0.7436 | 0.7477 | 0.7463 | 0.7470 | 0.7480 | 0.7463 |
| **SCDA** | 0.7421 | 0.7739 | 0.8852 | 0.9417 | 0.9486 | 0.9517 | 0.9500 | 0.9320 |
| **BiU-Net** | **0.9142** | **0.9248** | **0.9645** | **0.9806** | **0.9824** | **0.9840** | **0.9837** | **0.9772** |

**Table S4.** Model's imputation performances on chromosome 22 in the LOS (Louisiana Osteoporosis Study) dataset under 5% missing ratio. The test set contains 754 samples from all populations, each with 257,352 SNPs. Bold fonts mark the highest values. "Acc" represents accuracy, "Prc" represents precision, "Rec" represents recall. Precision, recall, and F1 are calculated as macro averages.

| **5% Missing** | | | | | | | | | |
| --- | --- | --- | --- | --- | --- | --- | --- | --- | --- |
| **#SNPs** | | **80535** | **43321** | **87563** | **17259** | **11414** | **9073** | **8187** | **257352** |
| **MAF** | | **<=0.5%** | **0.5%~1%** | **1%~10%** | **10%~20%** | **20%~30%** | **30%~40%** | **40%~50%** | **Overall** |
| **Acc** | **Beagle** | 0.9969 | 0.9929 | 0.9707 | 0.8794 | 0.8183 | 0.7780 | 0.7591 | 0.9562 |
| **SCDA** | 0.9993 | 0.9988 | 0.9977 | 0.9943 | 0.9923 | 0.9915 | 0.9913 | 0.9975 |
| **BiU-Net** | **0.9999** | **0.9993** | **0.9983** | **0.9966** | **0.9962** | **0.9959** | **0.9959** | **0.9986** |
| **R2** | **Beagle** | 0.8968 | 0.8978 | 0.9070 | 0.9053 | 0.8717 | 0.8412 | 0.8207 | 0.9191 |
| **SCDA** | 0.9354 | 0.9552 | 0.9817 | 0.9886 | 0.9860 | 0.9840 | 0.9828 | 0.9881 |
| **BiU-Net** | **0.9937** | **0.9721** | **0.9860** | **0.9931** | **0.9927** | **0.9921** | **0.9918** | **0.9932** |
| **Prc** | **Beagle** | 0.7493 | 0.7496 | 0.7500 | 0.7490 | 0.7489 | 0.7490 | 0.7493 | 0.7494 |
| **SCDA** | 0.9916 | 0.9914 | 0.9902 | 0.9904 | 0.9904 | 0.9909 | 0.9912 | 0.9909 |
| **BiU-Net** | **0.9987** | **0.9981** | **0.9960** | **0.9955** | **0.9957** | **0.9958** | **0.9959** | **0.9962** |
| **Rec** | **Beagle** | 0.7500 | 0.7490 | 0.7498 | 0.7489 | 0.7490 | 0.7491 | 0.7494 | 0.7494 |
| **SCDA** | 0.9411 | 0.9585 | 0.9852 | 0.9931 | 0.9929 | 0.9921 | 0.9915 | 0.9906 |
| **BiU-Net** | **0.9946** | **0.9741** | **0.9874** | **0.9948** | **0.9958** | **0.9959** | **0.9959** | **0.9937** |
| **F1** | **Beagle** | 0.7497 | 0.7493 | 0.7499 | 0.7489 | 0.7489 | 0.7491 | 0.7494 | 0.7494 |
| **SCDA** | 0.9651 | 0.9744 | 0.9877 | 0.9917 | 0.9917 | 0.9915 | 0.9913 | 0.9907 |
| **BiU-Net** | **0.9966** | **0.9858** | **0.9917** | **0.9951** | **0.9957** | **0.9958** | **0.9959** | **0.9949** |

**Table S5.** Model's imputation performances on chromosome 22 in the LOS (Louisiana Osteoporosis Study) dataset under 15% missing ratio. The test set contains 754 samples from all populations, each with 257,352 SNPs. Bold fonts mark the highest values. "Acc" represents accuracy, "Prc" represents precision, "Rec" represents recall. Precision, recall, and F1 are calculated as macro averages.

| **15% Missing** | | | | | | | | | |
| --- | --- | --- | --- | --- | --- | --- | --- | --- | --- |
| **#SNPs** | | **80535** | **43321** | **87563** | **17259** | **11414** | **9073** | **8187** | **257352** |
| **MAF** | | **<=0.5%** | **0.5%~1%** | **1%~10%** | **10%~20%** | **20%~30%** | **30%~40%** | **40%~50%** | **Overall** |
| **Acc** | **Beagle** | 0.9968 | 0.9928 | 0.9703 | 0.8789 | 0.8171 | 0.7766 | 0.7576 | 0.9558 |
| **SCDA** | 0.9986 | 0.9977 | **0.9950** | **0.9898** | 0.9873 | 0.9861 | 0.9860 | 0.9953 |
| **BiU-Net** | **0.9991** | **0.9980** | 0.9949 | 0.9897 | **0.9881** | **0.9874** | **0.9875** | **0.9956** |
| **R2** | **Beagle** | 0.8834 | 0.8902 | 0.9029 | 0.9030 | 0.8688 | 0.8379 | 0.8172 | 0.9166 |
| **SCDA** | 0.8809 | 0.9128 | **0.9589** | **0.9790** | 0.9762 | 0.9732 | 0.9714 | 0.9772 |
| **BiU-Net** | **0.9256** | **0.9259** | 0.9580 | 0.9787 | **0.9776** | **0.9757** | **0.9747** | **0.9787** |
| **Prc** | **Beagle** | 0.7469 | 0.7471 | 0.7487 | 0.7488 | 0.7476 | 0.7475 | 0.7476 | 0.7485 |
| **SCDA** | 0.9865 | 0.9866 | 0.9858 | 0.9863 | 0.9860 | 0.9858 | 0.9859 | 0.9873 |
| **BiU-Net** | **0.9968** | **0.9949** | **0.9883** | **0.9864** | **0.9867** | **0.9870** | **0.9874** | **0.9886** |
| **Rec** | **Beagle** | 0.7442 | 0.7455 | 0.7479 | 0.7487 | 0.7478 | 0.7478 | 0.7479 | 0.7482 |
| **SCDA** | 0.8945 | 0.9216 | **0.9637** | **0.9846** | 0.9864 | 0.9862 | 0.9860 | 0.9790 |
| **BiU-Net** | **0.9311** | **0.9312** | 0.9617 | 0.9839 | **0.9868** | **0.9873** | **0.9875** | **0.9796** |
| **F1** | **Beagle** | 0.7455 | 0.7463 | 0.7483 | 0.7487 | 0.7477 | 0.7476 | 0.7478 | 0.7483 |
| **SCDA** | 0.9359 | 0.9519 | 0.9745 | **0.9855** | 0.9862 | 0.9860 | 0.9859 | 0.9831 |
| **BiU-Net** | **0.9617** | **0.9609** | **0.9746** | 0.9851 | **0.9868** | **0.9871** | **0.9874** | **0.9841** |

**Table S6.** Model's imputation performances on chromosome 22 in the LOS (Louisiana Osteoporosis Study) dataset under 25% missing ratio. The test set contains 754 samples from all populations, each with 257,352 SNPs. Bold fonts mark the highest values. "Acc" represents accuracy, "Prc" represents precision, "Rec" represents recall. Precision, recall, and F1 are calculated as macro averages.

| **25% Missing** | | | | | | | | | |
| --- | --- | --- | --- | --- | --- | --- | --- | --- | --- |
| **#SNPs** | | **80535** | **43321** | **87563** | **17259** | **11414** | **9073** | **8187** | **257352** |
| **MAF** | | **<=0.5%** | **0.5%~1%** | **1%~10%** | **10%~20%** | **20%~30%** | **30%~40%** | **40%~50%** | **Overall** |
| **Acc** | **Beagle** | 0.9967 | 0.9926 | 0.9697 | 0.8776 | 0.8158 | 0.7756 | 0.7567 | 0.9554 |
| **SCDA** | 0.9982 | 0.9964 | **0.9914** | **0.9824** | 0.9787 | 0.9769 | 0.9767 | 0.9922 |
| **BiU-Net** | **0.9986** | **0.9967** | 0.9914 | 0.9819 | **0.9790** | **0.9779** | **0.9779** | **0.9925** |
| **R2** | **Beagle** | 0.8709 | **0.8813** | 0.8975 | 0.8997 | 0.8652 | 0.8342 | 0.8134 | 0.9135 |
| **SCDA** | 0.8394 | 0.8642 | 0.9283 | 0.9626 | 0.9587 | 0.9539 | 0.9509 | 0.9614 |
| **BiU-Net** | **0.8805** | 0.8788 | **0.9287** | **0.9628** | **0.9605** | **0.9573** | **0.9553** | **0.9634** |
| **Prc** | **Beagle** | 0.7452 | 0.7458 | 0.7463 | 0.7473 | 0.7462 | 0.7462 | 0.7463 | 0.7473 |
| **SCDA** | 0.9769 | 0.9792 | 0.9802 | **0.9805** | **0.9791** | **0.9776** | 0.9769 | **0.9826** |
| **BiU-Net** | **0.9952** | **0.9919** | **0.9808** | 0.9768 | 0.9769 | 0.9773 | **0.9778** | 0.9806 |
| **Rec** | **Beagle** | 0.7392 | 0.7423 | 0.7445 | 0.7469 | 0.7465 | 0.7469 | 0.7471 | 0.7466 |
| **SCDA** | 0.8637 | 0.8804 | **0.9350** | 0.9701 | 0.9750 | 0.9761 | 0.9766 | 0.9627 |
| **BiU-Net** | **0.8888** | **0.8866** | 0.9342 | **0.9712** | **0.9765** | **0.9776** | **0.9779** | **0.9647** |
| **F1** | **Beagle** | 0.7422 | 0.7440 | 0.7454 | 0.7471 | 0.7463 | 0.7465 | 0.7467 | 0.7469 |
| **SCDA** | 0.9130 | 0.9244 | **0.9566** | **0.9752** | **0.9770** | 0.9768 | 0.9767 | 0.9724 |
| **BiU-Net** | **0.9358** | **0.9331** | 0.9563 | 0.9740 | 0.9767 | **0.9774** | **0.9778** | **0.9725** |

**Table S7.** Model's imputation performances on chromosome 22 in the SGDP (Simons Genome Diversity Project) dataset under 5% missing ratio. The test set contains 44 samples from all populations, each with 117,318 SNPs. After imputation, Beagle removed 6,468 SNPs, most of these ignored sites are not found in the reference panel, leaving only 110,850 sites. Beagle's performances are benchmarked against the reserved SNPs, while SCDA and BiU-Net benchmarked against all SNPs. Bold fonts mark the highest values. "Acc" represents accuracy, "Prc" represents precision, "Rec" represents recall. Precision, recall, and F1 are calculated as macro averages.

| **5% Missing** | | | | | | | | | |
| --- | --- | --- | --- | --- | --- | --- | --- | --- | --- |
| **#SNPs** | | **2631** | **3398** | **43281** | **23204** | **15873** | **15835** | **13096** | **117318** |
| **#SNPs, Beagle** | | **2442** | **3189** | **40929** | **21997** | **15128** | **14964** | **12201** | **110850** |
| **MAF** | | **<=0.5%** | **0.5%~1%** | **1%~10%** | **10%~20%** | **20%~30%** | **30%~40%** | **40%~50%** | **Overall** |
| **Acc** | **Beagle** | 0.9867 | 0.9854 | 0.9611 | 0.8934 | 0.8389 | 0.8086 | 0.7933 | 0.8932 |
| **SCDA** | 0.9744 | 0.9745 | 0.9664 | 0.9483 | 0.9385 | 0.9417 | 0.9408 | 0.9533 |
| **BiU-Net** | **0.9984** | **0.9987** | **0.9979** | **0.9939** | **0.9920** | **0.9930** | **0.9932** | **0.9951** |
| **R2** | **Beagle** | 0.8943 | 0.8830 | 0.9288 | 0.9183 | 0.8912 | 0.8719 | 0.8578 | 0.9160 |
| **SCDA** | 0.5264 | 0.5314 | 0.8346 | 0.8974 | 0.8956 | 0.9011 | 0.8953 | 0.9038 |
| **BiU-Net** | **0.9593** | **0.9601** | **0.9860** | **0.9846** | **0.9824** | **0.9842** | **0.9839** | **0.9872** |
| **Prc** | **Beagle** | 0.7608 | 0.7652 | 0.7565 | 0.7541 | 0.7527 | 0.7535 | 0.7550 | 0.7543 |
| **SCDA** | 0.7057 | 0.7200 | 0.8721 | 0.9202 | 0.9275 | 0.9372 | 0.9380 | 0.9262 |
| **BiU-Net** | **0.9884** | **0.9847** | **0.9890** | **0.9910** | **0.9913** | **0.9925** | **0.9929** | **0.9921** |
| **Rec** | **Beagle** | 0.7614 | 0.7659 | 0.7567 | 0.7541 | 0.7527 | 0.7535 | 0.7550 | 0.7543 |
| **SCDA** | 0.7354 | 0.7566 | 0.8608 | 0.9070 | 0.9201 | 0.9339 | 0.9365 | 0.9170 |
| **BiU-Net** | **0.9753** | **0.9825** | **0.9957** | **0.9910** | **0.9906** | **0.9928** | **0.9932** | **0.9930** |
| **F1** | **Beagle** | 0.7608 | 0.7654 | 0.7566 | 0.7541 | 0.7526 | 0.7535 | 0.7550 | 0.7543 |
| **SCDA** | 0.7161 | 0.7326 | 0.8659 | 0.9133 | 0.9236 | 0.9355 | 0.9372 | 0.9215 |
| **BiU-Net** | **0.9818** | **0.9836** | **0.9924** | **0.9910** | **0.9909** | **0.9927** | **0.9930** | **0.9926** |

**Table S8.** Model's imputation performances on chromosome 22 in the SGDP (Simons Genome Diversity Project) dataset under 15% missing ratio. The test set contains 44 samples from all populations, each with 117,318 SNPs. After imputation, Beagle removed 6,468 SNPs, most of these ignored sites are not found in the reference panel, leaving only 110,850 sites. Beagle's performances are benchmarked against the reserved SNPs, while SCDA and BiU-Net benchmarked against all SNPs. Bold fonts mark the highest values. "Acc" represents accuracy, "Prc" represents precision, "Rec" represents recall. Precision, recall, and F1 are calculated as macro averages.

| **15% Missing** | | | | | | | | | |
| --- | --- | --- | --- | --- | --- | --- | --- | --- | --- |
| **#SNPs** | | **2631** | **3398** | **43281** | **23204** | **15873** | **15835** | **13096** | **117318** |
| **#SNPs, Beagle** | | **2442** | **3189** | **40929** | **21997** | **15128** | **14964** | **12201** | **110850** |
| **MAF** | | **<=0.5%** | **0.5%~1%** | **1%~10%** | **10%~20%** | **20%~30%** | **30%~40%** | **40%~50%** | **Overall** |
| **Acc** | **Beagle** | 0.9860 | 0.9842 | 0.9595 | 0.8892 | 0.8355 | 0.8033 | 0.7885 | 0.8900 |
| **SCDA** | 0.9448 | 0.9458 | 0.9285 | 0.8954 | 0.8785 | 0.8829 | 0.8819 | 0.9047 |
| **BiU-Net** | **0.9976** | **0.9974** | **0.9886** | **0.9781** | **0.9752** | **0.9778** | **0.9777** | **0.9825** |
| **R2** | **Beagle** | 0.8869 | 0.8683 | 0.9236 | 0.9134 | 0.8869 | 0.8664 | 0.8521 | 0.9118 |
| **SCDA** | 0.2085 | 0.2174 | 0.6349 | 0.7700 | 0.7693 | 0.7759 | 0.7661 | 0.7808 |
| **BiU-Net** | **0.9343** | **0.9286** | **0.9335** | **0.9470** | **0.9458** | **0.9504** | **0.9490** | **0.9557** |
| **Prc** | **Beagle** | 0.7498 | 0.7463 | 0.7481 | 0.7452 | 0.7478 | 0.7468 | 0.7493 | 0.7477 |
| **SCDA** | 0.4573 | 0.4752 | 0.7261 | 0.8424 | 0.8627 | 0.8797 | 0.8808 | 0.8540 |
| **BiU-Net** | **0.9708** | **0.9640** | **0.9660** | **0.9705** | **0.9724** | **0.9766** | **0.9771** | **0.9746** |
| **Rec** | **Beagle** | 0.7512 | 0.7488 | 0.7477 | 0.7449 | 0.7478 | 0.7469 | 0.7495 | 0.7475 |
| **SCDA** | 0.6181 | 0.6463 | 0.7535 | 0.8231 | 0.8455 | 0.8682 | 0.8738 | 0.8411 |
| **BiU-Net** | **0.9716** | **0.9743** | **0.9533** | **0.9654** | **0.9718** | **0.9772** | **0.9775** | **0.9727** |
| **F1** | **Beagle** | 0.7503 | 0.7473 | 0.7479 | 0.7451 | 0.7478 | 0.7469 | 0.7494 | 0.7476 |
| **SCDA** | 0.5119 | 0.5308 | 0.7392 | 0.8322 | 0.8536 | 0.8733 | 0.8765 | 0.8473 |
| **BiU-Net** | **0.9712** | **0.9691** | **0.9596** | **0.9679** | **0.9721** | **0.9769** | **0.9773** | **0.9737** |

**Table S9.** Model's imputation performances on chromosome 22 in the SGDP (Simons Genome Diversity Project) dataset under 25% missing ratio. The test set contains 44 samples from all populations, each with 117,318 SNPs. After imputation, Beagle removed 6,468 SNPs, most of these ignored sites are not found in the reference panel, leaving only 110,850 sites. Beagle's performances are benchmarked against the reserved SNPs, while SCDA and BiU-Net benchmarked against all SNPs. Bold fonts mark the highest values. "Acc" represents accuracy, "Prc" represents precision, "Rec" represents recall. Precision, recall, and F1 are calculated as macro averages.

| **25% Missing** | | | | | | | | | |
| --- | --- | --- | --- | --- | --- | --- | --- | --- | --- |
| **#SNPs** | | **2631** | **3398** | **43281** | **23204** | **15873** | **15835** | **13096** | **117318** |
| **#SNPs, Beagle** | | **2442** | **3189** | **40929** | **21997** | **15128** | **14964** | **12201** | **110850** |
| **MAF** | | **<=0.5%** | **0.5%~1%** | **1%~10%** | **10%~20%** | **20%~30%** | **30%~40%** | **40%~50%** | **Overall** |
| **Acc** | **Beagle** | 0.9864 | 0.9844 | 0.9587 | 0.8893 | 0.8336 | 0.7996 | 0.7831 | 0.8884 |
| **SCDA** | 0.9209 | 0.9231 | 0.9032 | 0.8655 | 0.8455 | 0.8495 | 0.8489 | 0.8756 |
| **BiU-Net** | **0.9962** | **0.9956** | **0.9813** | **0.9660** | **0.9620** | **0.9658** | **0.9658** | **0.9726** |
| **R2** | **Beagle** | 0.8874 | 0.8654 | **0.9198** | 0.9117 | 0.8838 | 0.8620 | 0.8465 | 0.9090 |
| **SCDA** | 0.1360 | 0.1431 | 0.5118 | 0.6817 | 0.6835 | 0.6897 | 0.6796 | 0.6920 |
| **BiU-Net** | **0.8958** | **0.8812** | 0.8931 | **0.9179** | **0.9179** | **0.9242** | **0.9221** | **0.9312** |
| **Prc** | **Beagle** | 0.7587 | 0.7530 | 0.7447 | 0.7463 | 0.7454 | 0.7422 | 0.7429 | 0.7447 |
| **SCDA** | 0.3889 | 0.4049 | 0.6454 | 0.8001 | 0.8301 | 0.8501 | 0.8523 | 0.8125 |
| **BiU-Net** | **0.9620** | **0.9517** | **0.9489** | **0.9548** | **0.9577** | **0.9641** | **0.9648** | **0.9612** |
| **Rec** | **Beagle** | 0.7597 | 0.7534 | 0.7436 | 0.7457 | 0.7454 | 0.7424 | 0.7433 | 0.7443 |
| **SCDA** | 0.6148 | 0.6384 | 0.7192 | 0.7859 | 0.8081 | 0.8323 | 0.8396 | 0.8052 |
| **BiU-Net** | **0.9475** | **0.9496** | **0.9177** | **0.9459** | **0.9568** | **0.9649** | **0.9656** | **0.9565** |
| **F1** | **Beagle** | 0.7588 | 0.7528 | 0.7441 | 0.7460 | 0.7454 | 0.7423 | 0.7431 | 0.7445 |
| **SCDA** | 0.4452 | 0.4628 | 0.6786 | 0.7926 | 0.8181 | 0.8398 | 0.8440 | 0.8087 |
| **BiU-Net** | **0.9546** | **0.9505** | **0.9328** | **0.9503** | **0.9572** | **0.9645** | **0.9652** | **0.9588** |

**Table S10.** Model's imputation performances on the HLA region of chromosome 6 in the SGDP (Simons Genome Diversity Project) dataset under 5% missing ratio. The test set contains 44 samples from all populations, each with 47,740 SNPs. After imputation, Beagle removed 6,444 SNPs, most of these ignored sites are not found in the reference panel, leaving only 41,296 sites. Beagle's performances are benchmarked against the reserved SNPs, while SCDA and BiU-Net benchmarked against all SNPs. Bold fonts mark the highest values. "Acc" represents accuracy, "Prc" represents precision, "Rec" represents recall. Precision, recall, and F1 are calculated as macro averages.

| **5% Missing** | | | | | | | | | |
| --- | --- | --- | --- | --- | --- | --- | --- | --- | --- |
| **#SNPs** | | **427** | **680** | **16799** | **9609** | **7631** | **6170** | **6424** | **47740** |
| **#SNPs, Beagle** | | **385** | **608** | **15186** | **8291** | **6297** | **5390** | **5139** | **41296** |
| **MAF** | | **<=0.5%** | **0.5%~1%** | **1%~10%** | **10%~20%** | **20%~30%** | **30%~40%** | **40%~50%** | **Overall** |
| **Acc** | **Beagle** | 0.9847 | 0.9794 | 0.9538 | 0.8880 | 0.8441 | 0.8114 | 0.7869 | 0.8852 |
| **SCDA** | 0.9731 | 0.9685 | 0.9727 | 0.9655 | 0.9682 | 0.9706 | 0.9707 | 0.9699 |
| **BiU-Net** | **0.9992** | **0.9998** | **0.9995** | **0.9983** | **0.9984** | **0.9986** | **0.9986** | **0.9989** |
| **R2** | **Beagle** | 0.8802 | 0.8016 | 0.9220 | 0.9202 | 0.8976 | 0.8736 | 0.8516 | 0.9137 |
| **SCDA** | 0.4392 | 0.1997 | 0.8845 | 0.9437 | 0.9527 | 0.9534 | 0.9522 | 0.9471 |
| **BiU-Net** | **0.9790** | **0.9888** | **0.9975** | **0.9970** | **0.9978** | **0.9979** | **0.9976** | **0.9979** |
| **Prc** | **Beagle** | 0.7250 | 0.7123 | 0.7477 | 0.7466 | 0.7539 | 0.7526 | 0.7538 | 0.7513 |
| **SCDA** | 0.7324 | 0.6124 | 0.9132 | 0.9449 | 0.9601 | 0.9671 | 0.9691 | 0.9552 |
| **BiU-Net** | **0.9998** | **0.9995** | **0.9978** | **0.9971** | **0.9979** | **0.9984** | **0.9985** | **0.9980** |
| **Rec** | **Beagle** | 0.7293 | 0.7137 | 0.7478 | 0.7466 | 0.7539 | 0.7526 | 0.7538 | 0.7513 |
| **SCDA** | 0.6019 | 0.5073 | 0.8864 | 0.9394 | 0.9589 | 0.9667 | 0.9691 | 0.9494 |
| **BiU-Net** | **0.9834** | **0.9857** | **0.9992** | **0.9973** | **0.9979** | **0.9984** | **0.9985** | **0.9983** |
| **F1** | **Beagle** | 0.7198 | 0.7107 | 0.7476 | 0.7466 | 0.7539 | 0.7526 | 0.7538 | 0.7513 |
| **SCDA** | 0.6334 | 0.5323 | 0.8992 | 0.9421 | 0.9595 | 0.9669 | 0.9691 | 0.9523 |
| **BiU-Net** | **0.9915** | **0.9924** | **0.9985** | **0.9972** | **0.9979** | **0.9984** | **0.9985** | **0.9981** |

**Table S11.** Model's imputation performances on the HLA region of chromosome 6 in the SGDP (Simons Genome Diversity Project) dataset under 15% missing ratio. The test set contains 44 samples from all populations, each with 47,740 SNPs. After imputation, Beagle removed 6,444 SNPs, most of these ignored sites are not found in the reference panel, leaving only 41,296 sites. Beagle's performances are benchmarked against the reserved SNPs, while SCDA and BiU-Net benchmarked against all SNPs. Bold fonts mark the highest values. "Acc" represents accuracy, "Prc" represents precision, "Rec" represents recall. Precision, recall, and F1 are calculated as macro averages.

| **15% Missing** | | | | | | | | | |
| --- | --- | --- | --- | --- | --- | --- | --- | --- | --- |
| **#SNPs** | | **427** | **680** | **16799** | **9609** | **7631** | **6170** | **6424** | **47740** |
| **#SNPs, Beagle** | | **385** | **608** | **15186** | **8291** | **6297** | **5390** | **5139** | **41296** |
| **MAF** | | **<=0.5%** | **0.5%~1%** | **1%~10%** | **10%~20%** | **20%~30%** | **30%~40%** | **40%~50%** | **Overall** |
| **Acc** | **Beagle** | 0.9847 | 0.9820 | 0.9542 | 0.8883 | 0.8411 | 0.8015 | 0.7824 | 0.8831 |
| **SCDA** | 0.9629 | 0.9569 | 0.9544 | 0.9410 | 0.9450 | 0.9498 | 0.9509 | 0.9492 |
| **BiU-Net** | **0.9996** | **0.9988** | **0.9964** | **0.9939** | **0.9946** | **0.9952** | **0.9954** | **0.9954** |
| **R2** | **Beagle** | 0.8719 | 0.8174 | 0.9215 | 0.9195 | 0.8948 | 0.8662 | 0.8475 | 0.9113 |
| **SCDA** | 0.2973 | 0.1175 | 0.7906 | 0.8914 | 0.9081 | 0.9122 | 0.9110 | 0.9005 |
| **BiU-Net** | **0.9868** | **0.9710** | **0.9838** | **0.9898** | **0.9925** | **0.9929** | **0.9926** | **0.9919** |
| **Prc** | **Beagle** | 0.7303 | 0.7491 | 0.7504 | 0.7481 | 0.7495 | 0.7398 | 0.7487 | 0.7472 |
| **SCDA** | 0.5604 | 0.4508 | **0.8420** | 0.9090 | 0.9336 | 0.9456 | 0.9493 | **0.9249** |
| **BiU-Net** | **0.9993** | **0.9864** | 0.7918 | **0.9239** | **0.9928** | **0.9945** | **0.9951** | 0.7942 |
| **Rec** | **Beagle** | 0.7315 | 0.7503 | 0.7504 | 0.7479 | 0.7495 | 0.7399 | 0.7488 | 0.7471 |
| **SCDA** | 0.6061 | 0.4649 | **0.8402** | 0.9029 | 0.9307 | 0.9434 | 0.9483 | **0.9203** |
| **BiU-Net** | **0.9909** | **0.9570** | 0.7879 | **0.9237** | **0.9931** | **0.9946** | **0.9951** | 0.7939 |
| **F1** | **Beagle** | 0.7248 | 0.7483 | 0.7504 | 0.7479 | 0.7494 | 0.7397 | 0.7485 | 0.7471 |
| **SCDA** | 0.5717 | 0.4389 | **0.8411** | 0.9060 | 0.9322 | 0.9445 | 0.9488 | **0.9226** |
| **BiU-Net** | **0.9951** | **0.9711** | 0.7898 | **0.9238** | **0.9930** | **0.9945** | **0.9951** | 0.7940 |

**Table S12.** Model's imputation performances on the HLA region of chromosome 6 in the SGDP (Simons Genome Diversity Project) dataset under 25% missing ratio. The test set contains 44 samples from all populations, each with 47,740 SNPs. After imputation, Beagle removed 6,444 SNPs, most of these ignored sites are not found in the reference panel, leaving only 41,296 sites. Beagle's performances are benchmarked against the reserved SNPs, while SCDA and BiU-Net benchmarked against all SNPs. Bold fonts mark the highest values. "Acc" represents accuracy, "Prc" represents precision, "Rec" represents recall. Precision, recall, and F1 are calculated as macro averages.

| **25% Missing** | | | | | | | | | |
| --- | --- | --- | --- | --- | --- | --- | --- | --- | --- |
| **#SNPs** | | **427** | **680** | **16799** | **9609** | **7631** | **6170** | **6424** | **47740** |
| **#SNPs, Beagle** | | **385** | **608** | **15186** | **8291** | **6297** | **5390** | **5139** | **41296** |
| **MAF** | | **<=0.5%** | **0.5%~1%** | **1%~10%** | **10%~20%** | **20%~30%** | **30%~40%** | **40%~50%** | **Overall** |
| **Acc** | **Beagle** | 0.9844 | 0.9789 | 0.9523 | 0.8858 | 0.8413 | 0.8074 | 0.7788 | 0.8822 |
| **SCDA** | 0.9417 | 0.9364 | 0.9284 | 0.9083 | 0.9122 | 0.9200 | 0.9220 | 0.9201 |
| **BiU-Net** | **0.9993** | **0.9974** | **0.9934** | **0.9903** | **0.9913** | **0.9923** | **0.9924** | **0.9923** |
| **R2** | **Beagle** | 0.8719 | 0.7927 | 0.9169 | 0.9166 | 0.8940 | 0.8688 | 0.8440 | 0.9097 |
| **SCDA** | 0.1792 | 0.0617 | 0.6580 | 0.8124 | 0.8370 | 0.8433 | 0.8428 | 0.8260 |
| **BiU-Net** | **0.9830** | **0.9308** | **0.9714** | **0.9840** | **0.9879** | **0.9887** | **0.9884** | **0.9868** |
| **Prc** | **Beagle** | 0.7272 | 0.7005 | 0.7410 | 0.7427 | 0.7501 | 0.7478 | 0.7445 | 0.7457 |
| **SCDA** | 0.4318 | 0.3682 | 0.7494 | **0.8618** | 0.8974 | 0.9159 | 0.9209 | **0.8828** |
| **BiU-Net** | **0.9995** | **0.9847** | **0.9168** | 0.8528 | **0.9885** | **0.9911** | **0.9919** | 0.8564 |
| **Rec** | **Beagle** | 0.7266 | 0.7092 | 0.7408 | 0.7423 | 0.7501 | 0.7479 | 0.7447 | 0.7455 |
| **SCDA** | 0.6068 | 0.4572 | 0.7914 | **0.8600** | 0.8928 | 0.9111 | 0.9185 | **0.8832** |
| **BiU-Net** | 0.9859 | 0.9383 | 0.9059 | 0.8523 | **0.9887** | **0.9911** | **0.9920** | 0.8553 |
| **F1** | **Beagle** | 0.7217 | 0.7024 | 0.7407 | 0.7424 | 0.7499 | 0.7478 | 0.7446 | 0.7455 |
| **SCDA** | 0.4854 | 0.3848 | 0.7694 | **0.8609** | 0.8950 | 0.9134 | 0.9195 | **0.8830** |
| **BiU-Net** | **0.9926** | **0.9606** | **0.9113** | 0.8526 | **0.9886** | **0.9911** | **0.9919** | 0.8559 |

**Table S13.** Model's imputation performances on the African American cohort of chromosome 22 in the LOS (Louisiana Osteoporosis Study) dataset under 5% missing ratio. The test set contains 312 samples, each with 307,599 SNPs. Bold fonts mark the highest values. "Acc" represents accuracy, "Prc" represents precision, "Rec" represents recall. Precision, recall, and F1 are calculated as macro averages.

| **5% Missing** | | | | | | | | | |
| --- | --- | --- | --- | --- | --- | --- | --- | --- | --- |
| **#SNPs** | | **72297** | **41655** | **120279** | **30423** | **17490** | **13326** | **12129** | **307599** |
| **MAF** | | **<=0.5%** | **0.5%~1%** | **1%~10%** | **10%~20%** | **20%~30%** | **30%~40%** | **40%~50%** | **Overall** |
| **Acc** | **Beagle** | 0.9966 | 0.9928 | 0.9653 | 0.8802 | 0.8194 | 0.7797 | 0.7591 | 0.9435 |
| **SCDA** | 0.9944 | 0.9932 | 0.9850 | 0.9584 | 0.9405 | 0.9296 | 0.9241 | 0.9784 |
| **BiU-Net** | **1.0000** | **0.9999** | **0.9970** | **0.9939** | **0.9928** | **0.9927** | **0.9928** | **0.9972** |
| **R2** | **Beagle** | 0.9123 | 0.9173 | 0.9059 | 0.8956 | 0.8700 | 0.8418 | 0.8201 | 0.9138 |
| **SCDA** | 0.5640 | 0.7058 | 0.8485 | 0.8691 | 0.8447 | 0.8169 | 0.7951 | 0.8730 |
| **BiU-Net** | **0.9976** | **0.9956** | **0.9788** | **0.9872** | **0.9882** | **0.9882** | **0.9880** | **0.9896** |
| **Prc** | **Beagle** | 0.7516 | 0.7509 | 0.7504 | 0.7503 | 0.7497 | 0.7501 | 0.7498 | 0.7503 |
| **SCDA** | 0.7086 | 0.8099 | 0.9233 | 0.9491 | 0.9457 | 0.9385 | 0.9311 | 0.9442 |
| **BiU-Net** | **0.9975** | **0.9982** | **0.9963** | **0.9933** | **0.9925** | **0.9926** | **0.9928** | **0.9945** |
| **Rec** | **Beagle** | 0.7527 | 0.7517 | 0.7504 | 0.7503 | 0.7497 | 0.7502 | 0.7499 | 0.7503 |
| **SCDA** | 0.9448 | 0.9366 | 0.9158 | 0.9172 | 0.9194 | 0.9221 | 0.9229 | 0.9198 |
| **BiU-Net** | **0.9989** | **0.9959** | **0.9792** | **0.9884** | **0.9909** | **0.9922** | **0.9927** | **0.9887** |
| **F1** | **Beagle** | 0.7522 | 0.7513 | 0.7504 | 0.7503 | 0.7497 | 0.7501 | 0.7498 | 0.7503 |
| **SCDA** | 0.8016 | 0.8667 | 0.9195 | 0.9326 | 0.9316 | 0.9287 | 0.9247 | 0.9317 |
| **BiU-Net** | **0.9982** | **0.9971** | **0.9876** | **0.9908** | **0.9917** | **0.9924** | **0.9927** | **0.9916** |

**Table S14.** Model's imputation performances on the African American cohort of chromosome 22 in the LOS (Louisiana Osteoporosis Study) dataset under 15% missing ratio. The test set contains 312 samples, each with 307,599 SNPs. Bold fonts mark the highest values. "Acc" represents accuracy, "Prc" represents precision, "Rec" represents recall. Precision, recall, and F1 are calculated as macro averages.

| **15% Missing** | | | | | | | | | |
| --- | --- | --- | --- | --- | --- | --- | --- | --- | --- |
| **#SNPs** | | **72297** | **41655** | **120279** | **30423** | **17490** | **13326** | **12129** | **307599** |
| **MAF** | | **<=0.5%** | **0.5%~1%** | **1%~10%** | **10%~20%** | **20%~30%** | **30%~40%** | **40%~50%** | **Overall** |
| **Acc** | **Beagle** | 0.9965 | 0.9925 | 0.9646 | 0.8788 | 0.8175 | 0.7779 | 0.7569 | 0.9428 |
| **SCDA** | 0.9919 | 0.9891 | 0.9757 | 0.9306 | 0.8985 | 0.8782 | 0.8680 | 0.9640 |
| **BiU-Net** | **0.9994** | **0.9978** | **0.9906** | **0.9792** | **0.9752** | **0.9748** | **0.9752** | **0.9903** |
| **R2** | **Beagle** | 0.9032 | 0.9078 | 0.9012 | 0.8923 | 0.8663 | 0.8380 | 0.8156 | 0.9107 |
| **SCDA** | 0.4260 | 0.5497 | 0.7383 | 0.7602 | 0.7183 | 0.6753 | 0.6451 | 0.7702 |
| **BiU-Net** | **0.9587** | **0.9316** | **0.9333** | **0.9549** | **0.9571** | **0.9571** | **0.9564** | **0.9632** |
| **Prc** | **Beagle** | 0.7459 | 0.7462 | 0.7474 | 0.7481 | 0.7475 | 0.7481 | 0.7472 | 0.7481 |
| **SCDA** | 0.6420 | 0.7522 | 0.9074 | 0.9398 | 0.9288 | 0.9126 | 0.8997 | 0.9347 |
| **BiU-Net** | **0.9897** | **0.9923** | **0.9875** | **0.9788** | **0.9754** | **0.9751** | **0.9752** | **0.9825** |
| **Rec** | **Beagle** | 0.7465 | 0.7451 | 0.7472 | 0.7482 | 0.7476 | 0.7484 | 0.7477 | 0.7480 |
| **SCDA** | 0.8997 | 0.8587 | 0.8570 | 0.8605 | 0.8619 | 0.8647 | 0.8656 | 0.8620 |
| **BiU-Net** | **0.9644** | **0.9260** | **0.9355** | **0.9602** | **0.9683** | **0.9729** | **0.9748** | **0.9611** |
| **F1** | **Beagle** | 0.7462 | 0.7457 | 0.7473 | 0.7481 | 0.7476 | 0.7482 | 0.7475 | 0.7481 |
| **SCDA** | 0.7374 | 0.7998 | 0.8810 | 0.8963 | 0.8900 | 0.8809 | 0.8723 | 0.8960 |
| **BiU-Net** | **0.9767** | **0.9568** | **0.9600** | **0.9692** | **0.9718** | **0.9739** | **0.9750** | **0.9715** |

**Table S15.** Model's imputation performances on the African American cohort of chromosome 22 in the LOS (Louisiana Osteoporosis Study) dataset under 25% missing ratio. The test set contains 312 samples, each with 307,599 SNPs. Bold fonts mark the highest values. "Acc" represents accuracy, "Prc" represents precision, "Rec" represents recall. Precision, recall, and F1 are calculated as macro averages.

| **25% Missing** | | | | | | | | | |
| --- | --- | --- | --- | --- | --- | --- | --- | --- | --- |
| **#SNPs** | | **72297** | **41655** | **120279** | **30423** | **17490** | **13326** | **12129** | **307599** |
| **MAF** | | **<=0.5%** | **0.5%~1%** | **1%~10%** | **10%~20%** | **20%~30%** | **30%~40%** | **40%~50%** | **Overall** |
| **Acc** | **Beagle** | 0.9963 | 0.9923 | 0.9638 | 0.8765 | 0.8147 | 0.7744 | 0.7532 | 0.9417 |
| **SCDA** | 0.9902 | 0.9863 | 0.9670 | 0.9016 | 0.8540 | 0.8233 | 0.8080 | 0.9497 |
| **BiU-Net** | **0.9986** | **0.9960** | **0.9835** | **0.9600** | **0.9509** | **0.9495** | **0.9499** | **0.9818** |
| **R2** | **Beagle** | 0.8909 | **0.8988** | **0.8959** | 0.8880 | 0.8616 | 0.8327 | 0.8097 | 0.9069 |
| **SCDA** | 0.3369 | 0.4464 | 0.6373 | 0.6551 | 0.6020 | 0.5518 | 0.5188 | 0.6713 |
| **BiU-Net** | **0.9009** | 0.8776 | 0.8813 | **0.9100** | **0.9106** | **0.9087** | **0.9058** | **0.9276** |
| **Prc** | **Beagle** | 0.7418 | 0.7422 | 0.7436 | 0.7443 | 0.7439 | 0.7441 | 0.7430 | 0.7446 |
| **SCDA** | 0.6033 | 0.7161 | 0.8953 | 0.9315 | 0.9143 | 0.8925 | 0.8771 | 0.9270 |
| **BiU-Net** | **0.9705** | **0.9789** | **0.9752** | **0.9614** | **0.9540** | **0.9517** | **0.9506** | **0.9678** |
| **Rec** | **Beagle** | 0.7395 | 0.7394 | 0.7430 | 0.7443 | 0.7443 | 0.7447 | 0.7439 | 0.7444 |
| **SCDA** | 0.8422 | 0.7946 | 0.7951 | 0.8000 | 0.8006 | 0.8034 | 0.8043 | 0.8008 |
| **BiU-Net** | **0.9199** | **0.8740** | **0.8885** | **0.9232** | **0.9367** | **0.9454** | **0.9490** | **0.9266** |
| **F1** | **Beagle** | 0.7406 | 0.7408 | 0.7433 | 0.7443 | 0.7441 | 0.7444 | 0.7434 | 0.7445 |
| **SCDA** | 0.6906 | 0.7515 | 0.8405 | 0.8551 | 0.8433 | 0.8291 | 0.8172 | 0.8564 |
| **BiU-Net** | **0.9437** | **0.9201** | **0.9274** | **0.9411** | **0.9448** | **0.9482** | **0.9495** | **0.9462** |

**Table S16.** Model's imputation performances on the Caucasian cohort of chromosome 22 in the LOS (Louisiana Osteoporosis Study) dataset under 5% missing ratio. The test set contains 442 samples from all populations, each with 188,399 SNPs. Bold fonts mark the highest values. "Acc" represents accuracy, "Prc" represents precision, "Rec" represents recall. Precision, recall, and F1 are calculated as macro averages.

| **5% Missing** | | | | | | | | | |
| --- | --- | --- | --- | --- | --- | --- | --- | --- | --- |
| **#SNPs** | | **52524** | **20151** | **54011** | **19838** | **15717** | **13401** | **12757** | **188399** |
| **MAF** | | **<=0.5%** | **0.5%~1%** | **1%~10%** | **10%~20%** | **20%~30%** | **30%~40%** | **40%~50%** | **Overall** |
| **Acc** | **Beagle** | 0.9973 | 0.9933 | 0.9623 | 0.8751 | 0.8144 | 0.7738 | 0.7537 | 0.9263 |
| **SCDA** | 0.9858 | 0.9844 | 0.9745 | 0.9453 | 0.9314 | 0.9229 | 0.9216 | 0.9648 |
| **BiU-Net** | **1.0000** | **0.9998** | **0.9983** | **0.9978** | **0.9977** | **0.9977** | **0.9977** | **0.9987** |
| **R2** | **Beagle** | 0.9284 | 0.9323 | 0.9178 | 0.8992 | 0.8686 | 0.8367 | 0.8144 | 0.9138 |
| **SCDA** | 0.3219 | 0.5384 | 0.7977 | 0.8463 | 0.8334 | 0.8095 | 0.7970 | 0.8455 |
| **BiU-Net** | **0.9970** | **0.9946** | **0.9907** | **0.9953** | **0.9957** | **0.9954** | **0.9953** | **0.9962** |
| **Prc** | **Beagle** | 0.7477 | 0.7456 | 0.7498 | 0.7496 | 0.7494 | 0.7488 | 0.7486 | 0.7493 |
| **SCDA** | 0.5053 | 0.6652 | 0.8776 | 0.9277 | 0.9336 | 0.9293 | 0.9269 | 0.9213 |
| **BiU-Net** | **0.9983** | **0.9978** | **0.9964** | **0.9971** | **0.9975** | **0.9976** | **0.9977** | **0.9976** |
| **Rec** | **Beagle** | 0.7491 | 0.7461 | 0.7495 | 0.7496 | 0.7494 | 0.7489 | 0.7487 | 0.7492 |
| **SCDA** | 0.9166 | 0.9138 | 0.8994 | 0.9035 | 0.9124 | 0.9166 | 0.9205 | 0.9113 |
| **BiU-Net** | **0.9972** | **0.9938** | **0.9910** | **0.9966** | **0.9975** | **0.9976** | **0.9977** | **0.9967** |
| **F1** | **Beagle** | 0.7484 | 0.7458 | 0.7497 | 0.7496 | 0.7494 | 0.7488 | 0.7486 | 0.7493 |
| **SCDA** | 0.6180 | 0.7601 | 0.8883 | 0.9152 | 0.9223 | 0.9216 | 0.9218 | 0.9162 |
| **BiU-Net** | **0.9977** | **0.9958** | **0.9937** | **0.9969** | **0.9975** | **0.9976** | **0.9977** | **0.9972** |

**Table S17.** Model's imputation performances on the Caucasian cohort of chromosome 22 in the LOS (Louisiana Osteoporosis Study) dataset under 15% missing ratio. The test set contains 442 samples from all populations, each with 188,399 SNPs. Bold fonts mark the highest values. "Acc" represents accuracy, "Prc" represents precision, "Rec" represents recall. Precision, recall, and F1 are calculated as macro averages.

| **15% Missing** | | | | | | | | | |
| --- | --- | --- | --- | --- | --- | --- | --- | --- | --- |
| **#SNPs** | | **52524** | **20151** | **54011** | **19838** | **15717** | **13401** | **12757** | **188399** |
| **MAF** | | **<=0.5%** | **0.5%~1%** | **1%~10%** | **10%~20%** | **20%~30%** | **30%~40%** | **40%~50%** | **Overall** |
| **Acc** | **Beagle** | 0.9972 | 0.9931 | 0.9617 | 0.8749 | 0.8141 | 0.7737 | 0.7542 | 0.9261 |
| **SCDA** | 0.9813 | 0.9787 | 0.9640 | 0.9188 | 0.8929 | 0.8771 | 0.8721 | 0.9473 |
| **BiU-Net** | **0.9995** | **0.9982** | **0.9950** | **0.9931** | **0.9929** | **0.9929** | **0.9929** | **0.9959** |
| **R2** | **Beagle** | 0.9181 | 0.9235 | 0.9136 | 0.8970 | 0.8665 | 0.8345 | 0.8126 | 0.9118 |
| **SCDA** | 0.2320 | 0.4109 | 0.6952 | 0.7460 | 0.7176 | 0.6816 | 0.6614 | 0.7486 |
| **BiU-Net** | **0.9674** | **0.9535** | **0.9721** | **0.9855** | **0.9868** | **0.9861** | **0.9855** | **0.9876** |
| **Prc** | **Beagle** | 0.7447 | 0.7477 | 0.7486 | 0.7501 | 0.7492 | 0.7487 | 0.7489 | 0.7495 |
| **SCDA** | 0.4558 | 0.6050 | 0.8552 | 0.9163 | 0.9156 | 0.9037 | 0.8967 | 0.9076 |
| **BiU-Net** | **0.9962** | **0.9936** | **0.9896** | **0.9913** | **0.9924** | **0.9928** | **0.9929** | **0.9927** |
| **Rec** | **Beagle** | 0.7435 | 0.7440 | 0.7474 | 0.7499 | 0.7493 | 0.7490 | 0.7492 | 0.7493 |
| **SCDA** | 0.8720 | 0.8467 | 0.8497 | 0.8547 | 0.8621 | 0.8667 | 0.8702 | 0.8612 |
| **BiU-Net** | **0.9580** | **0.9354** | **0.9726** | **0.9895** | **0.9922** | **0.9928** | **0.9929** | **0.9892** |
| **F1** | **Beagle** | 0.7441 | 0.7458 | 0.7480 | 0.7500 | 0.7493 | 0.7489 | 0.7490 | 0.7494 |
| **SCDA** | 0.5577 | 0.6944 | 0.8524 | 0.8829 | 0.8847 | 0.8789 | 0.8753 | 0.8833 |
| **BiU-Net** | **0.9764** | **0.9627** | **0.9809** | **0.9904** | **0.9923** | **0.9928** | **0.9929** | **0.9910** |

**Table S18.** Model's imputation performances on the Caucasian cohort of chromosome 22 in the LOS (Louisiana Osteoporosis Study) dataset under 25% missing ratio. The test set contains 442 samples from all populations, each with 188,399 SNPs. Bold fonts mark the highest values. "Acc" represents accuracy, "Prc" represents precision, "Rec" represents recall. Precision, recall, and F1 are calculated as macro averages.

| **25% Missing** | | | | | | | | | |
| --- | --- | --- | --- | --- | --- | --- | --- | --- | --- |
| **#SNPs** | | **52524** | **20151** | **54011** | **19838** | **15717** | **13401** | **12757** | **188399** |
| **MAF** | | **<=0.5%** | **0.5%~1%** | **1%~10%** | **10%~20%** | **20%~30%** | **30%~40%** | **40%~50%** | **Overall** |
| **Acc** | **Beagle** | 0.9971 | 0.9929 | 0.9614 | 0.8736 | 0.8126 | 0.7721 | 0.7524 | 0.9254 |
| **SCDA** | 0.9784 | 0.9750 | 0.9542 | 0.8904 | 0.8510 | 0.8270 | 0.8177 | 0.9296 |
| **BiU-Net** | **0.9991** | **0.9972** | **0.9916** | **0.9879** | **0.9874** | **0.9873** | **0.9875** | **0.9930** |
| **R2** | **Beagle** | 0.9074 | 0.9141 | 0.9094 | 0.8938 | 0.8631 | 0.8308 | 0.8086 | 0.9091 |
| **SCDA** | 0.1780 | 0.3274 | 0.6009 | 0.6467 | 0.6074 | 0.5652 | 0.5407 | 0.6537 |
| **BiU-Net** | **0.9392** | **0.9267** | **0.9529** | **0.9745** | **0.9766** | **0.9754** | **0.9746** | **0.9786** |
| **Prc** | **Beagle** | 0.7452 | 0.7443 | 0.7491 | 0.7485 | 0.7476 | 0.7469 | 0.7467 | 0.7484 |
| **SCDA** | 0.4274 | 0.5686 | 0.8370 | 0.9057 | 0.8996 | 0.8828 | 0.8731 | 0.8955 |
| **BiU-Net** | **0.9940** | **0.9897** | **0.9827** | **0.9850** | **0.9865** | **0.9872** | **0.9875** | **0.9875** |
| **Rec** | **Beagle** | 0.7396 | 0.7376 | 0.7467 | 0.7482 | 0.7478 | 0.7474 | 0.7474 | 0.7479 |
| **SCDA** | 0.8244 | 0.7962 | 0.7961 | 0.8008 | 0.8068 | 0.8120 | 0.8148 | 0.8066 |
| **BiU-Net** | **0.9193** | **0.8979** | **0.9531** | **0.9813** | **0.9860** | **0.9872** | **0.9875** | **0.9811** |
| **F1** | **Beagle** | 0.7424 | 0.7409 | 0.7479 | 0.7484 | 0.7477 | 0.7471 | 0.7470 | 0.7482 |
| **SCDA** | 0.5193 | 0.6516 | 0.8156 | 0.8456 | 0.8421 | 0.8320 | 0.8250 | 0.8469 |
| **BiU-Net** | **0.9536** | **0.9390** | **0.9674** | **0.9832** | **0.9863** | **0.9872** | **0.9875** | **0.9843** |

**Table S19.** SNPs excluded from the Beagle’s imputation on the SGDP dataset, chromosome 22.

| **MAF_bin** | **Ignored** | **Total_SNPs_in_bin** | **Proportion** |
| --- | --- | --- | --- |
| **0.1%~0.5%** | 189 | 2631 | 7.18% |
| **0.5%~1%** | 209 | 3398 | 6.15% |
| **1%~10%** | 2352 | 43281 | 5.43% |
| **10%~20%** | 1207 | 23204 | 5.20% |
| **20%~30%** | 745 | 15873 | 4.69% |
| **30%~40%** | 871 | 15835 | 5.50% |
| **40%~50%** | 895 | 13096 | 6.83% |
| **Overall** | 6468 | 117318 | 40.98% |

**Table S20.** SNPs excluded from the Beagle’s imputation on the SGDP dataset, HLA region of chromosome 6.

| **MAF_bin** | **Ignored** | **Total_SNPs_in_bin** | **Proportion** |
| --- | --- | --- | --- |
| **0.1%~0.5%** | 42 | 427 | 9.84% |
| **0.5%~1%** | 72 | 680 | 10.59% |
| **1%~10%** | 1613 | 16799 | 9.60% |
| **10%~20%** | 1318 | 9609 | 13.72% |
| **20%~30%** | 1334 | 7631 | 17.48% |
| **30%~40%** | 780 | 6170 | 12.64% |
| **40%~50%** | 1285 | 6424 | 20.00% |
| **Overall** | 6444 | 47740 | 13.50% |


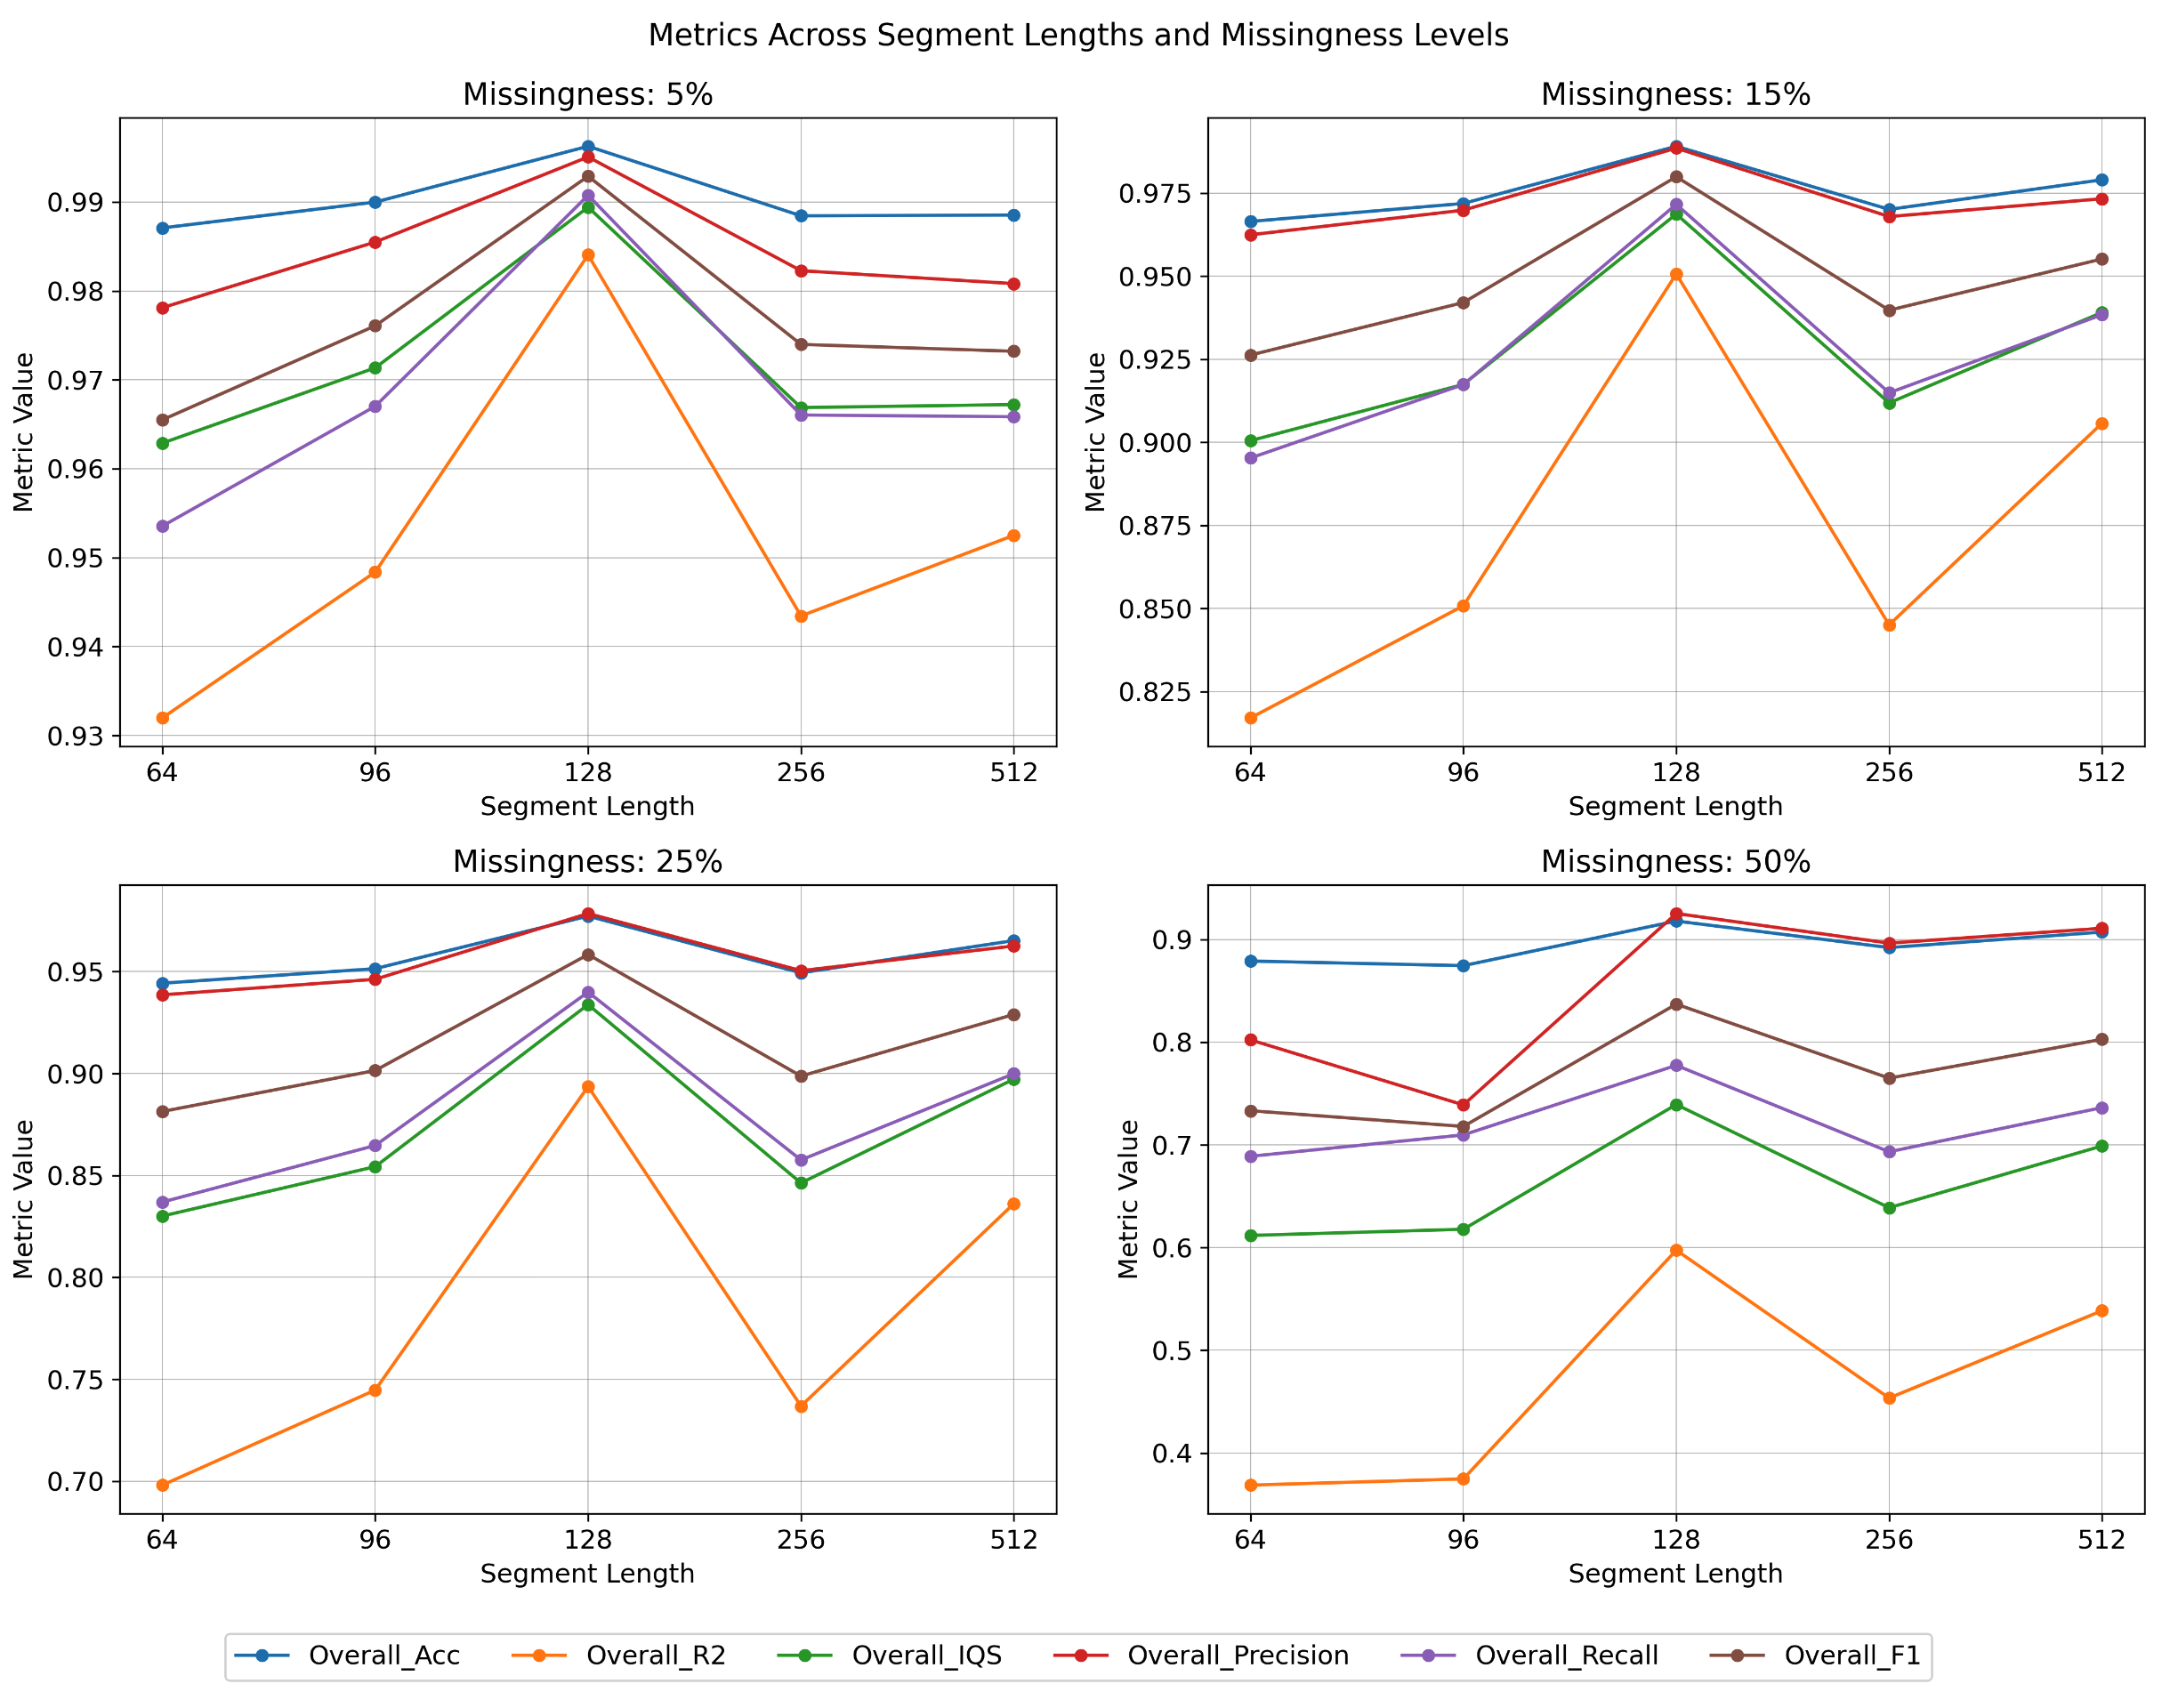


**Figure S1.** Overall imputation performance metrics on chromosome 22 of the 1KGP dataset across different segment lengths (overlap = 4 genotypes) and varying levels of missingness (5%, 15%, 25%, and 50%).

**
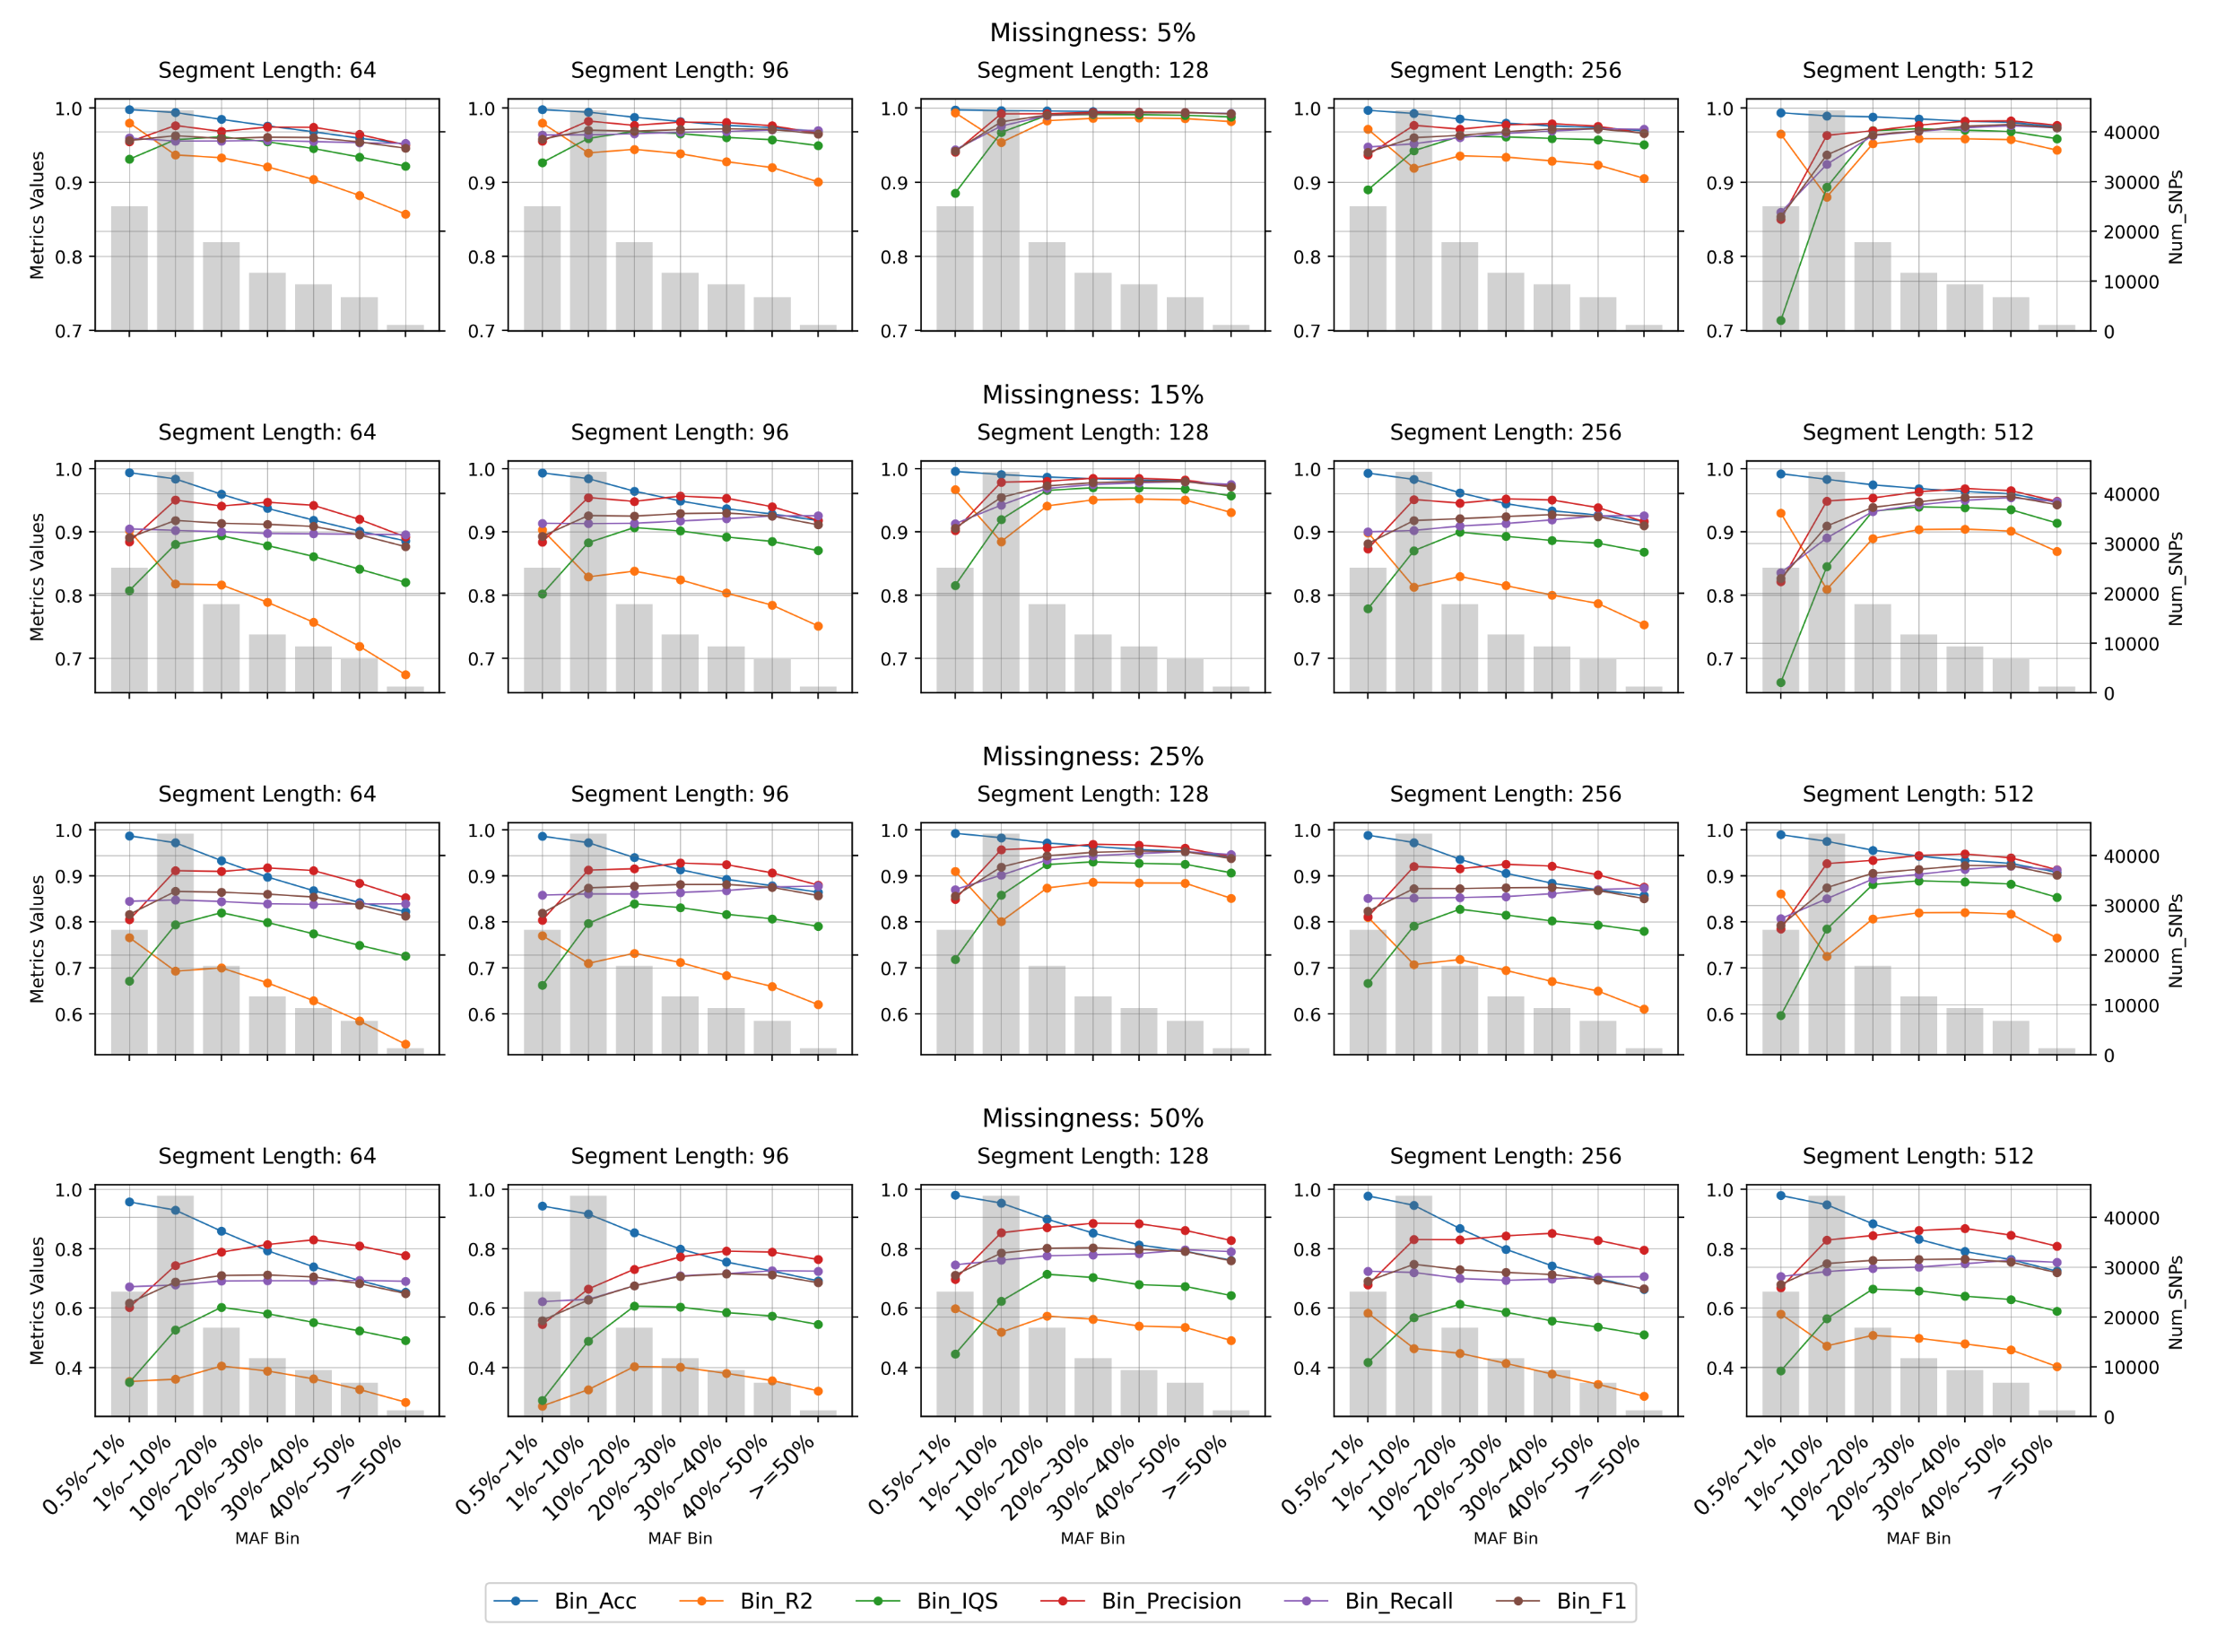
**

**Figure S2.** Imputation performance across different MAF bins for SNPs at varying segment lengths, with the overlap fixed at 4 genotypes (1KGP dataset).

**Figure S3.** Confusion matrix comparison of phased genotype imputation between Beagle (left) and BiU-Net (right) on the Caucasian cohort, chromosome 22 from the LOS dataset. Evaluation was conducted using a 5% simulated missingness under random state 0. BiU-Net was trained and tested with a segment length of 128 genotypes and an overlap of 16 genotypes. While Beagle demonstrates reasonable performance in dosage prediction, it struggles to accurately distinguish phased genotypes—particularly within heterozygous classes. In contrast, BiU-Net achieves substantially higher precision across all genotype categories, highlighting its advantage in haplotype-sensitive applications.

**Figure S4** **(identical to Figure 1 in the paper).** Performance comparison of imputation models on chromosome 22 in the 1KGP dataset. The evaluation metrics include accuracy, R2, precision, recall, and F1-score under three different missing data scenarios (5%, 15%, and 25%). The reported values in each subplot represent the overall performance of each method. The background bar chart indicates the number of SNPs processed. Both BiU-Net and SCDA achieve similar performance across different settings, consistently outperforming Beagle across all metrics and missing ratios. However, BiU-Net exhibits significantly higher performances than the other models for SNPs in the smallest minor allele frequency (MAF) bins, highlighting its superior imputation capability for rare variants.

**Figure S5.** Performance comparison of imputation models on chromosome 22 in the LOS dataset. The evaluation metrics include accuracy, R2, precision, recall, and F1-score under three different missing data scenarios (5%, 15%, and 25%). The reported values in each subplot represent the overall performance of each method. The background bar chart indicates the number of SNPs processed. Both BiU-Net and SCDA achieve similar performance across different settings, consistently outperforming Beagle across all metrics and missing ratios. However, BiU-Net exhibits significantly higher performances than the other models for SNPs in the smallest minor allele frequency (MAF) bins, highlighting its superior imputation capability for rare variants.

**Figure S6.** Performance comparison of imputation models on the HLA region of chromosome 6 in the SGDP dataset. The evaluation metrics include accuracy, R2, precision, recall, and F1-score under three different missing data scenarios (5%, 15%, and 25%). The reported values in each subplot represent the overall performance of each method. The background bar chart indicates the number of SNPs processed. Notably, Beagle automatically removes a subset of SNPs before imputation, and its performance is assessed only on the retained SNPs, whereas BiU-Net and SCDA are evaluated across all SNPs. BiU-Net consistently outperforms the other methods across all metrics and missing ratios, demonstrating its robustness in handling varying levels of missingness in the HLA region.

**Figure S7.** Performance comparison of imputation models on chromosome 22 in the SGDP dataset. The evaluation metrics include accuracy, R2, precision, recall, and F1-score under three different missing data scenarios (5%, 15%, and 25%). The reported values in each subplot represent the overall performance of each method. The background bar chart indicates the number of SNPs processed. Notably, Beagle automatically removes a subset of SNPs before imputation, and its performance is assessed only on the retained SNPs, whereas BiU-Net and SCDA are evaluated across all SNPs. BiU-Net consistently outperforms the other methods across all metrics and missing ratios, demonstrating its robustness in handling varying levels of missingness in the HLA region.

**Figure S8.** Performance comparison of imputation models on chromosome 22 in the LOS dataset (African American cohort). The evaluation metrics include accuracy, R2, precision, recall, and F1-score under three different missing data scenarios (5%, 15%, and 25%). The reported values in each subplot represent the overall performance of each method, while the background bar chart indicates the number of SNPs processed. BiU-Net consistently outperforms other models in Precision and F1-score for SNPs in the smallest minor allele frequency (MAF) bins, demonstrating superior imputation capability for rare variants. Additionally, BiU-Net achieves the highest R2 among all models when the missing rate is below 25%. However, as missingness increases, the performance gap between BiU-Net and reference-based models like Beagle diminishes. SCDA shows the worst R2 performance for rare variants, with a significant margin compared to the other models.

**Figure S9.** Performance comparison of imputation models on chromosome 22 in the LOS dataset (Caucasian cohort). The evaluation metrics include accuracy, R2, precision, recall, and F1-score under three different missing data scenarios (5%, 15%, and 25%). The reported values in each subplot represent the overall performance of each method, while the background bar chart indicates the number of SNPs processed. BiU-Net consistently outperforms the other methods across all metrics and missing ratios, demonstrating its robustness in handling varying levels of missingness for the Caucasian cohort in the LOS dataset. SCDA shows the worst R2 performance for rare variants, with a significant margin compared to the other models.

**Figure S10.** **(Identical to Figure 2 in the paper)** Comparison of imputation performance (R²) between cohort-specific models and a model trained on the admixed population (ALL) across varying missing data rates (5%, 15%, and 25%). Each scatter plot compares the per-sample imputation performance (R²) of the BiU-Net model trained on a specific cohort (African American [AA] or Caucasian [CA]) versus the model trained on the full admixed population (ALL). Points below the diagonal indicate samples where the ALL-trained model outperformed the cohort-specific model. In the African American cohort (top row), the ALL model consistently outperformed the AA-specific model across all missing data rates, suggesting improved generalizability due to the inclusion of broader genetic diversity in training. In contrast, for the Caucasian cohort (bottom row), the performance differences between the CA-specific and ALL models were minimal, with the CA-specific model slightly outperforming the ALL model in some cases.
